# Supplementary material for: Differential expression of proteins in genetically distinct Trypanosoma cruzi samples (TcI and TcII DTUs) isolated from chronic Chagas disease cardiac patients
Source: Parasit Vectors. 2018 Nov 29;11:611. doi: 10.1186/s13071-018-3181-1 (PMC6267078; doi:10.1186/s13071-018-3181-1)
Supplement: Supplementary file 1 — Table S1. Protein/peptide mass spectrometry data and derived parameters. (XLSX 110 kb) [file 13071_2018_3181_MOESM1_ESM.xlsx]

## Sheet: Plan1
Spot nº/Strain	Acess nº	Id. Protein	Gene	Peptides	# PSM	Unique Peptides	Coverage	pI	# AA	Obs. MW [kDa]	Area
22/PR150	TCSYLVIO_990036	Elongation factor 2	EF2	31	57	31	42.25	6.04	846	75.70	4.9102e+07
	Sequence	Modifications	Position in Protein	Theo. MH+ [Da]	Area	DeltaM [ppm]
	LWGDSFFDAK		[242-251]	1185.56	6.12896e+07	0.04
	SQANTLTLSVR		[817-827]	1189.65	4.94668e+07	-0.03
	SATITDDGESPHPLR		[467-481]	1595.77	3.65497e+07	-0.47
	KQDLYEDKPVQR		[423-434]	1518.79	3.61238e+07	0.15
	EGVLCDENMR	1xCarbamidomethyl [C5]	[677-686]	1222.52	1.33806e+07	-0.49
	KIWCYGPDNR	1xCarbamidomethyl [C4]	[636-645]	1308.62	9.36702e+06	-0.34
	ADEIAR		[61-66]	674.347	8.13227e+06	2.09
	DSFVAAWQWATR		[665-676]	1437.69	7.43545e+06	-0.35
	FDWDVAEAR		[627-635]	1108.51	6877562	-0.34
	DLQEDFMNGAPLK		[546-558]	1477.7	6.68628e+06	-1.99
	NMSVIAHVDHGK		[21-32]	1307.65	5.98441e+06	-0.38
	YQEAVEDMPCGNVVGLVGVDK	1xCarbamidomethyl [C10]	[442-462]	2279.07	5.90591e+06	-1.41
	NCDPEAPLMLYISK	1xCarbamidomethyl [C2]; 1xOxidation [M9]	[371-384]	1666.78	5.61417e+06	-1.3
	AEMLYSGESGPDDK		[351-364]	1498.64	5.49284e+06	-0.63
	IRPVVFINK		[149-157]	1085.68	5.48413e+06	0.05
	AEMLYSGESGPDDKYYVGIK	1xOxidation [M3]	[351-370]	2238.03	4.58177e+06	0.48
	AEMLYSGESGPDDK	1xOxidation [M3]	[351-364]	1514.63	4.20473e+06	0.8
	NMSVIAHVDHGK	1xOxidation [M2]	[21-32]	1323.65	4.09607e+06	1.21
	AYLPVAESFGFTADLR		[774-789]	1756.89	3.85757e+06	0.12
	KGLKPDIPPLDTFLDK		[830-845]	1797.02	2.99511e+06	-0.68
	STLSDSLVGAAGIIK		[33-47]	1431.81	2.94549e+06	0.35
	SETNAAGER		[258-266]	934.422	2.44471e+06	-2.02
	RVFYACCLTAAPR	2xCarbamidomethyl [C6; C7]	[715-727]	1584.78	2.37636e+06	-1.22
	DLQEDFMNGAPLK	1xOxidation [M7]	[546-558]	1493.69	2.31144e+06	-0.61
	STAISMHYHVPPEIIADLPDDKR	1xOxidation [M6]	[72-94]	2621.3	1.98489e+06	1.42
	FLADKFDWDVAEAR		[622-635]	1682.82	1.88342e+06	0.8
	GVIIGEENRPGTPIYNVR		[756-773]	1984.06	1.50188e+06	-0.45
	STAISMHYHVPPEIIADLPDDKR		[72-94]	2605.31	1.15398e+06	0.79
	ALMDYPEQIR		[11-20]	1235.61	1.02799e+06	0.63
	GPNVVVDVTK		[646-655]	1027.58	745419	-0.66
	ETVTDVSSIQCLSK	1xCarbamidomethyl [C11]	[568-581]	1566.77		0.88
	VFYACCLTAAPR	2xCarbamidomethyl [C5; C6]	[716-727]	1428.68		-1.49
	VSEPVVSFR		[559-567]	1019.55		0.27
	GGGQIIPTAR		[705-714]	969.548		-1.33
	YSVSPVVR		[485-492]	906.504		1.39
101/PR150	TcCLB.503419.50	RNA-binding protein RGGm	RGG2	8	24	8	27.51	8.76	349	34.45	2.45838e+09
	Sequence	Modifications	Position in Protein	Theo. MH+ [Da]	Area	DeltaM [ppm]
	AVVEFVTPEDASR		[257-269]	1419.71	4.944e+09	0.72
	VQVSGVSDETTWHTLK		[222-237]	1786.9	1625405435	1.2
	EDREDTVLVNTR		[288-299]	1446.72	8.05725e+08	-1.1
	QAGEVTFCK	1xCarbamidomethyl [C8]	[242-250]	1039.49	3.3265e+08	-1.4
	EDTVLVNTR		[291-299]	1046.55	2.20914e+08	-0.01
	ARKEEAEHR		[312-320]	1125.58	5.47005e+07	-0.42
	AITELQASELEGATIFLR		[270-287]	1962.05	3.37918e+07	2.12
	RVDPLTLTAVEVEIDGIKK		[198-216]	2096.2	1.01886e+07	1.83
139/PR150	TcCLB.506925.130	Eukaryotic translation initiation fator 5a	EIF5A	7	57	7	58.68	5	167	9.88	7.179e+09
	Sequence	Modifications	Position in Protein	Theo. MH+ [Da]	Area	DeltaM [ppm]
	TSTYSVLDIQEDR		[89-101]	1526.73	9391251218	0.5
	VSIVATDIFTGNK		[59-71]	1364.74	7.14847e+09	0.97
	MEDQAPTTHNVDVPFVK	1xOxidation [M1]	[72-88]	1943.92	4.99727e+09	3.53
	MEDQAPTTHNVDVPFVK		[72-88]	1927.92	3.16764e+09	0.3
	VIDLSVSK		[43-50]	860.509	2.28023e+09	0.52
	TDPSKPAHLSLMDDEGETR	1xOxidation [M12]	[102-120]	2114.97	2.10038e+09	-0.42
	DNLDMPPNAELAAQIK	1xOxidation [M5]	[121-136]	1755.86	1931739484	-0.26
	TDPSKPAHLSLMDDEGETR		[102-120]	2098.97	1.87307e+09	-0.98
	DNLDMPPNAELAAQIK		[121-136]	1739.86	8.47766e+08	1.09
	GGYICINGRPCK	2xCarbamidomethyl [C5; C11]	[31-42]	1394.67	116140469	0.03
56/452	TcCLB.509583.10	Chaperonin TCP20	TP20	22	45	22	41.07	7.69	543	51.11	6.0947e+08
	Sequence	Modifications	Position in Protein	Theo. MH+ [Da]	Area	DeltaM [ppm]
	AYADAILVTPK		[444-454]	1161.65	8.58699e+08	0.85
	EGILALR		[313-319]	771.472	5.07971e+08	-0.76
	SFVVINQK		[293-300]	934.536	4.61739e+08	-0.6
	ILTEGFR		[119-125]	835.467	4.53135e+08	-0.31
	GIDGIALEMLAK	1xOxidation [M9]	[301-312]	1246.67	4.10442e+08	1.3
	MLVSGAGLIK		[47-56]	988.586	4.07888e+08	0.33
	FAETVTGK		[430-437]	852.446	2.93524e+08	-1.94
	GIDGIALEMLAK		[301-312]	1230.68	2.75833e+08	1.95
	SELNAGFYFK		[246-255]	1175.57	2.53914e+08	1.26
	MLVSGAGLIK	1xOxidation [M1]	[47-56]	1004.58	2.26551e+08	0.95
	GQSCTLLVK	1xCarbamidomethyl [C4]	[374-382]	1005.54	1.82365e+08	0.28
	GPNDHTIAQIK		[383-393]	1193.63	166758561	-1.39
	KANALEINMFASR		[17-29]	1464.76	144509675	0.52
	LSTDTSFVNGIVLDHGGR		[204-221]	1887.96	1.12149e+08	0.61
	VQEYTLGDDKYTYVEDVCK	1xCarbamidomethyl [C18]	[355-373]	2325.06	8.96677e+07	0.79
	DGNTLLGEMQIQHPTAALIAR	1xOxidation [M9]	[60-80]	2265.17	7.16862e+07	-0.2
	TNLGPR		[37-42]	657.368	71006848	-2.33
	KITDDR		[269-274]	747.4	6.92755e+07	-0.76
	VRDIIALK		[275-282]	927.599	6.49588e+07	-0.68
	KANALEINMFASR	1xOxidation [M9]	[17-29]	1480.76	6.05142e+07	-1.35
	VQEYTLGDDK		[355-364]	1167.55	4.00861e+07	-1.07
	ANALEINMFASR		[18-29]	1336.67	3.9503e+07	1.9
	TLAENSGLDVQHCLISLQEASR	1xCarbamidomethyl [C13]	[455-476]	2441.21	3.57381e+07	-0.06
	CIQDGLHPR	1xCarbamidomethyl [C1]	[110-118]	1095.54	3.40919e+07	-0.97
	EYLTNVAR		[149-156]	965.505		-0.34
72/452	TCSYLVIO_002198	Elongation factor 1-alpha (EF-1-alpha)	EF1A	19	56	1	44.79	8.98	489	43.99	6.96653e+08
	Sequence	Modifications	Position in Protein	Theo. MH+ [Da]	Area	DeltaM [ppm]
	LPLQDVYK		[276-283]	975.551	9.88825e+09	5.75
	IGGIGTVPVGR		[284-294]	1025.61	9833894279	2.09
	SVNFAQER		[199-206]	950.469	4.7975e+09	-1.33
	VETGTMKPGDVVTFAPANVTTEVK	1xOxidation [M6]	[295-318]	2507.27	4.02018e+09	2.47
	VGYNVEK		[221-227]	808.42	3.03386e+09	-1.93
	FIPISGWQGDNMIDK	1xOxidation [M12]	[230-244]	1736.83	2.52369e+09	0.98
	QTVAVGIIK		[459-467]	928.583	1.2504e+09	0.89
	FAEIESK		[400-406]	823.42	1.10202e+09	-1.12
	SENMPWYK	1xOxidation [M4]	[245-252]	1070.46	9.76653e+08	0.29
	SENMPWYK		[245-252]	1054.47	9.27329e+08	1.96
	VETGTMKPGDVVTFAPANVTTEVK		[295-318]	2491.27	8.91968e+08	3.56
	SIEMHHEQLAEATPGDNVGFNVK	1xOxidation [M4]	[319-341]	2539.19	6.96653e+08	1.79
	SIEMHHEQLAEATPGDNVGFNVK		[319-341]	2523.19	6.35227e+08	1.48
	EAAEIGK		[85-91]	717.378	556891442	-1.46
	MVPQKPMCVEVFNDYAPLGR	1xCarbamidomethyl [C8]; 2xOxidation [M1; M7]	[432-451]	2383.12	5.26254e+08	2.73
	FIPISGWQGDNMIDK		[230-244]	1720.84	4.58036e+08	1.86
	SGDAAMVR		[424-431]	806.383	4.35247e+08	-1.61
	QMVVCCNK	2xCarbamidomethyl [C5; C6]	[187-194]	1038.45	145843583	-1.17
	STATGHLIYK		[61-70]	1090.59	1.24582e+08	-1.43
	EHALLAFTLGVK		[175-186]	1298.75	4.74421e+07	0.61
	ELEKNPK		[414-420]	857.473	4.54699e+07	0.14
	VHMNLVVVGHVDAGK	1xOxidation [M3]	[46-60]	1590.84	4.24156e+07	-1.38
	SVFTIIDAPGHR		[125-136]	1312.7	1.68135e+07	1.99
26/PR150	TCSYLVIO_008621	Heat shock protein 85	HSP85	38	132	31	41.93	6.35	737	74.41	5.53662e+08
	Sequence	Modifications	Position in Protein	Theo. MH+ [Da]	Area	DeltaM [ppm]
	AISNDWEEPLSTK		[379-391]	1489.72	8.54523e+08	-1.28
	GVVDSEDLPLNISR		[451-464]	1513.79	5.14225e+08	-1.11
	TLTVEDTGIGMTK		[162-174]	1365.69	4.71267e+08	-1.85
	EVTQEFVVQNK		[346-356]	1320.68	2.92239e+08	-1.88
	YQSLTNQAVLGDESHLR		[135-151]	1930.96	2.35919e+08	-0.74
	APFDMFEPSK		[411-420]	1168.53	1.06086e+08	-1.02
	RAPFDMFEPSK		[410-420]	1324.64	4.64299e+07	-1.67
	AELVNNLGTIAR		[175-186]	1270.71	42482912	-0.5
	DSSMSAYMMSK	1xOxidation [M]	[685-695]	1253.48	2.65706e+07	-1.76
	ALELFEEIAENKEDYKK		[484-500]	2069.04	2.62177e+07	-1.65
	KKLETSPFIEQAR		[564-576]	1546.86	2.03786e+07	-0.37
	TLTVEDTGIGMTK	1xOxidation [M11]	[162-174]	1381.69	1.94515e+07	-1.33
	TMEINPAHPIVK		[697-708]	1349.72	1.7733e+07	-1.39
	KTMEINPAHPIVK	1xOxidation [M3]	[696-708]	1493.81	1.57052e+07	-2.26
	APFDMFEPSK	1xOxidation [M5]	[411-420]	1184.53	1.434e+07	-0.94
	KLMELLR		[522-528]	902.549	1.2884e+07	-2.24
	VEEVKDDAEEGEKK		[325-338]	1604.76	1.11255e+07	-0.94
	NEEGEEPKVEEVKDDAEEGEK		[317-337]	2389.05	1.00918e+07	-2.17
	RAPFDMFEPSK	1xOxidation [M6]	[410-420]	1340.63	9.65575e+06	-1.04
	HFSVEGQLEFR		[392-402]	1348.66	7.10227e+06	-2.73
	FHSSESGEDMTTLK		[529-542]	1568.69	5.9069e+06	-1.61
	KLETSPFIEQAR		[565-576]	1418.76	5.72364e+06	-1.61
	ELISNSSDACDKIR	1xCarbamidomethyl [C10]	[121-134]	1607.77	5.30936e+06	-3.96
	KALELFEEIAENK		[483-495]	1533.82	3.3682e+06	-2.03
	DVTKEEYAAFYK		[367-378]	1463.71	2.89849e+06	-1.19
	ALELFEEIAENKEDYK		[484-499]	1940.95	2.56371e+06	-2.89
	CIYYVTGDSK	1xCarbamidomethyl [C1]	[554-563]	1205.55	2.44158e+06	-1.11
	EVTDEDEDEAAATK		[303-316]	1522.64	2.22758e+06	-0.98
	LETSPFIEQAR		[566-576]	1290.67	1.89089e+06	-1.3
	EGVHFEETEEEKK		[611-623]	1590.73	1.38626e+06	-1.31
	TMEINPAHPIVK	1xOxidation [M2]	[697-708]	1365.72	852696	-2.66
	VEEVKDDAEEGEK		[325-337]	1476.67	741265	-0.78
	KTMEINPAHPIVK		[696-708]	1477.82		-1.83
	VKEVTQEFVVQNK		[344-356]	1547.84		-1.32
	EGVHFEETEEEK		[611-622]	1462.63		-1.6
	EDQQEYLEER		[266-275]	1338.58		-1.43
	DSSMSAYMMSK		[685-695]	1237.49		-0.76
	ALELFEEIAENK		[484-495]	1405.72		-1.26
	ELISNSSDACDK	1xCarbamidomethyl [C10]	[121-132]	1338.58		-1.85
	LGIHEDSANR		[511-520]	1111.55		-1.81
	RVEADENDK		[713-721]	1075.5		-2.32
	DVLGDKVEK		[641-649]	1002.55		-1.87
	CIYYVTGDSKK	1xCarbamidomethyl [C1]	[554-564]	1333.65		-1.45
	LKDLIK		[277-282]	729.487		1.29
28/PR150	TCSYLVIO_008621	Heat shock protein 85	HSP85	6	6	6	10.99	6.35	737	73.76	2.10452e+06
	Sequence	Modifications	Position in Protein	Theo. MH+ [Da]	Area	DeltaM [ppm]
	YQSLTNQAVLGDESHLR		[135-151]	1930.96	2.26801e+06	1.63
	GVVDSEDLPLNISR		[451-464]	1513.79	2.13215e+06	0.02
	AELVNNLGTIAR		[175-186]	1270.71	1.91341e+06	0.27
	AISNDWEEPLSTK		[379-391]	1489.72	1.01509e+06	-0.46
	TLTVEDTGIGMTK		[162-174]	1365.69	931284	-0.15
	KLETSPFIEQAR		[565-576]	1418.76	377466	0.55
35/PR150	TcCLB.511211.160	Heat shock protein 70 (HSP70)	HSP70	21	48	7	30.58	6.06	654	69.23	3.09467e+07
	Sequence	Modifications	Position in Protein	Theo. MH+ [Da]	Area	DeltaM [ppm]
	TTPSYVAFTDTER		[37-49]	1487.7	6.91051e+07	1.45
	DAGTIAGMEVLR		[161-172]	1232.63	3.52712e+07	0.35
	AVHDVVLVGGSTR		[334-346]	1309.72	1.6095e+07	0.05
	NQVAMNPTNTVFDAK		[57-71]	1649.8	1.53643e+07	0.76
	AVVTVPAYFNDSQR		[143-156]	1566.79	1.45574e+07	0.38
	GKDLTTSQR		[253-261]	1005.53	1.42298e+07	0.05
	IINEPTAAAIAYGLDK		[173-188]	1659.9	1.32811e+07	1.09
	GDDKPVIQVQFR		[98-109]	1401.75	8.37062e+06	0.34
	TFNPEEVSSMVLSK		[114-127]	1567.77	8.24797e+06	0.79
	MKEIAESYLGK		[128-138]	1268.66	4.64779e+06	0.15
	RNQIVITNDK		[502-511]	1200.67	4.22027e+06	0.08
	DAGTIAGMEVLR	1xOxidation [M8]	[161-172]	1248.63	3.96075e+06	0.9
	KFSDPVVQSDMK		[77-88]	1380.68	3.11391e+06	0.45
	NQIVITNDKGR		[503-513]	1257.69	2.64505e+06	-0.55
	VMQLVSDFFGGK		[350-361]	1327.67	2.24854e+06	0.79
	NQVAMNPTNTVFDAK	1xOxidation [M5]	[57-71]	1665.79	1.49859e+06	0.51
	VEIIANDQGNR		[26-36]	1228.63	911761	0.15
	ELENLCTPIMTK	1xCarbamidomethyl [C6]	[602-613]	1448.71	797714	0.31
	EIAESYLGK		[130-138]	1009.52	790049	0.5
	NQIVITNDK		[503-511]	1044.57	751877	0.12
	VMQLVSDFFGGK	1xOxidation [M2]	[350-361]	1343.67	505992	0.57
	KAVVTVPAYFNDSQR		[142-156]	1694.89	77232.4	0.67
	FSDPVVQSDMK		[78-88]	1252.59		0.2
	NTVNEPNVAGK		[555-565]	1142.58		0.73
41/PR150	TCSYLVIO_003281	Heat shock 70 kDa protein, mithocondrial precursor	HSP70	37	102	36	52.98	6.13	655	67.29	2.15447e+09
	Sequence	Modifications	Position in Protein	Theo. MH+ [Da]	Area	DeltaM [ppm]
	DAGTIAGLNVIR		[181-192]	1199.67	2.90341e+09	1.1
	TTPSVVAFK		[60-68]	949.535	1.8168e+09	1.82
	VVNEPTAAALAYGLDK		[193-208]	1631.86	1.74321e+09	-0.44
	VLENTEGFR		[51-59]	1064.54	1.64789e+09	-0.86
	STGIDLSNER		[267-276]	1091.53	1628287977	-0.99
	SKFESLAEK		[323-331]	1038.55	1.37073e+09	-2.08
	TLLAELR		[586-592]	815.499	1.26615e+09	-0.23
	SQTFSTAADNQTQVGIK		[443-459]	1795.88	8.1488e+08	0.64
	VSNAVVTCPAYFNDAQR	1xCarbamidomethyl [C8]	[160-176]	1911.9	7.96556e+08	0.32
	YVSDAEKENVR		[575-585]	1309.64	7.56136e+08	-1.37
	MKETAENFLGR		[148-158]	1295.64	7.10636e+08	-1.1
	RFEDSNIQHDIK		[100-111]	1501.74	6.8762e+08	-0.91
	EISEVVLVGGMTR		[353-365]	1389.74	6.68775e+08	-0.16
	NTTIPTKK		[435-442]	902.531	6.25582e+08	-1.82
	QAITNPQSTFFAVK		[81-94]	1551.82	573305720	0.32
	KVSNAVVTCPAYFNDAQR	1xCarbamidomethyl [C9]	[159-176]	2040	4.75318e+08	0.96
	GVNPDEAVALGAATLGGVLR		[384-403]	1880.02	4.58346e+08	0.71
	DAAVDLK		[346-352]	731.393	4.49765e+08	-1.72
	QYSPSQVGAFVLEK		[134-147]	1552.8	433808410	0.08
	NNAETQANTAER		[557-568]	1318.6	4.25413e+08	-1.21
	SMENPNVTKDELSAATDK		[594-611]	1949.91	4.20948e+08	-1.59
	EISEVVLVGGMTR	1xOxidation [M11]	[353-365]	1405.74	3.79067e+08	0.77
	ETAENFLGR		[150-158]	1036.51	3.5142e+08	1.4
	TQNITITASGGLSK		[516-529]	1390.75	3.49976e+08	0.05
	FEDSNIQHDIK		[101-111]	1345.64	3.36681e+08	-1.3
	TLLAELRK		[586-593]	943.593	2.72248e+08	-1.16
	MKETAENFLGR	1xOxidation [M1]	[148-158]	1311.64	250797816	-0.28
	KSMENPNVTKDELSAATDK	1xOxidation [M3]	[593-611]	2094	1.89976e+08	-2.43
	SMENPNVTKDELSAATDK	1xOxidation [M2]	[594-611]	1965.91	1.63424e+08	-0.03
	RQAITNPQSTFFAVK		[80-94]	1707.92	1.33719e+08	1.19
	KSMENPNVTKDELSAATDK		[593-611]	2078.01	1.32053e+08	-1.34
	DELSAATDK		[603-611]	949.447	1.24103e+08	-1.51
	TEYQQAAAANSSSSSGNTDSSQGEQQQQGDQQKQ		[622-655]	3573.52	112296228	-1.33
	SMENPNVTKDELSAATDKLQK		[594-614]	2319.15	6.75064e+07	0.75
	KSTGIDLSNER		[266-276]	1219.63	6.45055e+07	-1.08
	TEYQQAAAANSSSSSGNTDSSQGEQQQQGDQQK		[622-654]	3445.46	56170338	-1.02
	DELSAATDKLQK		[603-614]	1318.68	3.4608e+07	-0.48
	KSMENPNVTK		[593-602]	1147.58	2.93809e+07	-1.4
	DSESHAESDR		[538-547]	1132.45	2.90079e+07	-2.31
	KSMENPNVTK	1xOxidation [M3]	[593-602]	1163.57	2.29237e+07	-0.89
	EMAADNQMMGQFDLVGIPPAPR	2xOxidation [M2; M8]	[466-487]	2420.1	1.1059e+07	1.17
	SSNGDAWVQDANGK		[120-133]	1448.64		-0.17
43/PR150	TCSYLVIO_004969	Chaperonin HSP60, mitochondrial precursor	HSP60	44	134	44	66.55	5.5	562	65.35	4.26836e+09
	Sequence	Modifications	Position in Protein	Theo. MH+ [Da]	Area	DeltaM [ppm]
	AVGVILQSVAEQSR		[130-143]	1456.81	5.354e+09	1.09
	GYISPYFVTDAK		[205-216]	1360.68	4.12788e+09	-0.05
	AAVQEGIVPGGGVALLR		[415-431]	1606.93	3.32321e+09	1.53
	AVSAVATTLGPK		[30-41]	1114.65	3055622793	-0.22
	ALDSLLGDSSLTADQR		[435-450]	1661.83	2.97361e+09	-0.1
	NVIIEQSYGAPK		[44-55]	1318.7	2.32799e+09	1.28
	LPAHTIVLNAGK		[462-473]	1233.73	1.98654e+09	-0.01
	ITDALCSTR	1xCarbamidomethyl [C6]	[406-414]	1036.51	1.9441e+09	0.15
	TGVQIIR		[451-457]	786.483	1837702138	-1.64
	VLENNDVTVGYDAQR		[482-496]	1692.82	1403931992	1.53
	GLIDGETSDYNR		[361-372]	1339.61	1182282987	-0.8
	VSSIHTILPALNHVVR		[234-249]	1756.02	7.39669e+08	0.51
	VGGGSEVEVNEK		[391-402]	1203.59	6.99266e+08	-0.64
	EGAVVVEK		[474-481]	830.462	697713610	-0.55
	YVNMFEAGIIDPAR		[499-512]	1595.79	6.57648e+08	0.91
	VGKDGVITTQDGK		[176-188]	1317.7	614272481	-1.87
	AELEDAFVLVSAK		[220-232]	1391.74	599578507	0.76
	GLIDGETSDYNREK		[361-374]	1596.75	5.9486e+08	0.09
	AQKAELEDAFVLVSAK		[217-232]	1718.93	593508418	-0.16
	VGGGSEVEVNEKKDR		[391-405]	1602.81	5.21472e+08	-1.13
	TAMMQDIAIFAGAR	1xOxidation [M]	[293-306]	1511.73	4.76148e+08	1.16
	DGVITTQDGK		[179-188]	1033.52	433954598	-0.35
	TAMMQDIAIFAGAR	2xOxidation [M3; M4]	[293-306]	1527.73	3.91025e+08	-0.71
	KVSSIHTILPALNHVVR		[233-249]	1884.12	3.64174e+08	0.99
	TAMMQDIAIFAGAR		[293-306]	1495.74	3.56138e+08	1.12
	ERVELLR		[354-360]	914.542	276097195	-1.33
	AIEFKDPFENMGAQLVR	1xOxidation [M11]	[66-82]	1980.98	2.14301e+08	1.08
	YVNMFEAGIIDPAR	1xOxidation [M4]	[499-512]	1611.78	2.13368e+08	0.42
	VGGGSEVEVNEKK		[391-403]	1331.68	2.12204e+08	-2.41
	AIEFKDPFENMGAQLVR		[66-82]	1964.99	1.90957e+08	1.14
	CIATGTNPIDMK	1xCarbamidomethyl [C1]	[113-124]	1320.63	1.78819e+08	1.07
	DPFENMGAQLVR		[71-82]	1376.66	1.69706e+08	1.64
	DGVTVAK		[59-65]	689.383	1.55302e+08	-2.79
	AQKAELEDAFVLVSAKK		[217-233]	1847.03	154414592	-0.28
	ITKDGVTVAK		[56-65]	1031.61	1.15441e+08	-0.94
	LPAHTIVLNAGKEGAVVVEK		[462-481]	2045.18	1.1495e+08	0.14
	KVTSTENIVQVATISANGDEELGR		[144-167]	2531.29	109486368	2.49
	DRYVNMFEAGIIDPAR		[497-512]	1866.92	1.08136e+08	1.32
	GRNVIIEQSYGAPK		[42-55]	1531.82	7.99471e+07	0.21
	AELEDAFVLVSAKK		[220-233]	1519.84	7.93269e+07	0.78
	DDTVLLNGGGESSMVK		[338-353]	1621.77	7.63335e+07	1.17
	AVGVILQSVAEQSRK		[130-144]	1584.91	7.13361e+07	0.85
	DRITDALCSTR	1xCarbamidomethyl [C8]	[404-414]	1307.64	6.27186e+07	-0.26
	CIATGTNPIDMKR	1xCarbamidomethyl [C1]	[113-125]	1476.73	55577603	0.19
	DRYVNMFEAGIIDPAR	1xOxidation [M6]	[497-512]	1882.91	4.02943e+07	-0.01
	CIATGTNPIDMK	1xOxidation [M11]; 1xCarbamidomethyl [C1]	[113-124]	1336.62	3.27295e+07	2.58
	TNDLAGDGTTTSAVLVASVFSESLR		[88-112]	2511.26	27965646	-2.11
	TMTTELEVVEGMSIDR		[189-204]	1810.86	2.44595e+07	0.81
	TMTTELEVVEGMSIDR	1xOxidation [M2]	[189-204]	1826.85	1.64349e+07	-0.22
	VTSTENIVQVATISANGDEELGR		[145-167]	2403.2	8.28642e+06	-0.22
	ATITKDDTVLLNGGGESSMVK		[333-353]	2136.09		0.79
71/PR150	TCSYLVIO_004831	Thiol-dependent reductase 1	TDR1	18	80	11	36.63	5.97	445	46.04	1.05799e+10
	Sequence	Modifications	Position in Protein	Theo. MH+ [Da]	Area	DeltaM [ppm]
	ISSPANALIGSSPYQR		[77-92]	1660.87	1.26026e+10	-0.02
	EEFDWAAGELEK		[347-358]	1423.64	1.01952e+10	-0.41
	ETVPTLQVDGK		[51-61]	1186.63	9.77209e+09	-0.41
	ETVLKPEEYIIGFK		[199-212]	1665.91	9.74712e+09	-0.1
	ACTPDLTEGQDLLANYK	1xCarbamidomethyl [C2]	[392-408]	1908.9	9.39012e+09	1.23
	LLTAAAEAGLTSEAGK		[409-424]	1502.81	3.89537e+09	0.58
	LLTAAAEAGLTSEAGKK		[409-425]	1630.9	3.47127e+09	-0.73
	MYVTSMQR		[187-194]	1015.47	3278202474	-0.59
	YSPFSDRPR		[235-243]	1124.55	2.30195e+09	-2.51
	VPTSHVTWSLAPGYVLFVNK		[215-234]	2215.19	1792212182	1.36
	MYVTSMQR	1xOxidation [M1]	[187-194]	1031.46	543892996	-1.63
	ETVPTLQVDGKK		[51-62]	1314.73	4.36652e+08	-1.74
	VFFSLSEYSSIYK		[426-438]	1569.78	3.62292e+08	0.13
	KMYVTSMQR		[186-194]	1143.56	3.47687e+08	-1.21
	DPFNEEKR		[115-122]	1034.49	3.24161e+08	-2.47
	KVPTSHVTWSLAPGYVLFVNK		[214-234]	2343.29	1.56325e+08	-0.91
	VEFFLSEIGDLIK		[95-107]	1509.82	6.83547e+07	1.42
	HRVEFFLSEIGDLIK		[93-107]	1802.98	4.06836e+07	1.16
	KVFFSLSEYSSIYK		[425-438]	1697.88	3.64203e+07	-0.71
44/PR150	TCSYLVIO_004969	Chaperonin HSP60, mithocondrial precursor	HSP60	36	136	36	75.09	5.5	562	65.35	5.48496e+09
	Sequence	Modifications	Position in Protein	Theo. MH+ [Da]	Area	DeltaM [ppm]
	AVGVILQSVAEQSR		[130-143]	1456.81	7357762952	-0.17
	AAVQEGIVPGGGVALLR		[415-431]	1606.93	4.78538e+09	1.15
	ALDSLLGDSSLTADQR		[435-450]	1661.83	4.31173e+09	-0.17
	GYISPYFVTDAK		[205-216]	1360.68	3979853398	0.3
	AVSAVATTLGPK		[30-41]	1114.65	3.31195e+09	-1.31
	NVIIEQSYGAPK		[44-55]	1318.7	2.65377e+09	0.45
	AELEDAFVLVSAK		[220-232]	1391.74	2.38692e+09	0.58
	LPAHTIVLNAGK		[462-473]	1233.73	2.18969e+09	-1.1
	GLIDGETSDYNR		[361-372]	1339.61	2.09759e+09	-0.44
	VSSIHTILPALNHVVR		[234-249]	1756.02	1.90451e+09	0.83
	ITDALCSTR	1xCarbamidomethyl [C6]	[406-414]	1036.51	1.87283e+09	-1.03
	LSGGVAVIK		[382-390]	843.53	1.85745e+09	-1.8
	TGVQIIR		[451-457]	786.483	1.74566e+09	-2.42
	VLENNDVTVGYDAQR		[482-496]	1692.82	1.61936e+09	0.66
	YVNMFEAGIIDPAR		[499-512]	1595.79	1505781463	1.67
	VGGGSEVEVNEK		[391-402]	1203.59	1.41057e+09	-1.56
	DGVITTQDGK		[179-188]	1033.52	1.01545e+09	-0.94
	TAMMQDIAIFAGAR	1xOxidation [M]	[293-306]	1511.73	9.31852e+08	0.68
	APGFGDNK		[285-292]	805.384	891583884	-3.1
	EGAVVVEK		[474-481]	830.462	8.2794e+08	-2.83
	TAMMQDIAIFAGAR		[293-306]	1495.74	7.27948e+08	0.63
	TAMMQDIAIFAGAR	2xOxidation [M3; M4]	[293-306]	1527.73	5.97299e+08	-0.79
	YVNMFEAGIIDPAR	1xOxidation [M4]	[499-512]	1611.78	5.14959e+08	0.42
	DDTVLLNGGGESSMVK		[338-353]	1621.77	3.37481e+08	1.02
	DPFENMGAQLVR		[71-82]	1376.66	3.30667e+08	0.48
	AIEFKDPFENMGAQLVR		[66-82]	1964.99	3.20435e+08	0.3
	AIEFKDPFENMGAQLVR	1xOxidation [M11]	[66-82]	1980.98	2.43631e+08	0.89
	CIATGTNPIDMK	1xCarbamidomethyl [C1]	[113-124]	1320.63	2.25309e+08	4.49
	DGVTVAK		[59-65]	689.383	2.20793e+08	-3.5
	ERVELLR		[354-360]	914.542	1.94674e+08	-1.86
	LVGEEGSGLELDAENFDPAILGTVK		[307-331]	2573.3	1.8578e+08	0.37
	VGGGSEVEVNEKK		[391-403]	1331.68	1.14838e+08	-1.86
	TNDLAGDGTTTSAVLVASVFSESLR		[88-112]	2511.26	8.93833e+07	2.07
	TMTTELEVVEGMSIDR	1xOxidation [M]	[189-204]	1826.85	8.82501e+07	1.18
	CIATGTNPIDMK	1xCarbamidomethyl [C1]; 1xOxidation [M11]	[113-124]	1336.62	8.78542e+07	0.76
	DRYVNMFEAGIIDPAR		[497-512]	1866.92	6.94824e+07	1.52
	TGRPLLIIADDVESEALTTMIFNK	1xOxidation [M20]	[250-273]	2663.4	5.65949e+07	0.22
	VGKDGVITTQDGK		[176-188]	1317.7	4.54238e+07	-2.88
	TGRPLLIIADDVESEALTTMIFNK		[250-273]	2647.4	3.77803e+07	1.3
	DRYVNMFEAGIIDPAR	1xOxidation [M6]	[497-512]	1882.91	3.48059e+07	-0.49
	VTSTENIVQVATISANGDEELGR		[145-167]	2403.2	30585531	0.49
	KVTSTENIVQVATISANGDEELGR		[144-167]	2531.29	2.25197e+07	0.61
	KVSSIHTILPALNHVVR		[233-249]	1884.12	1.70435e+07	0.35
26/452	TcCLB.507713.30	Heat shock protein 85	HSP85	40	98	33	43.18	5.15	704	74.41	2.19143e+09
	Sequence	Modifications	Position in Protein	Theo. MH+ [Da]	Area	DeltaM [ppm]
	GVVDSEDLPLNISR		[362-375]	1513.79	2.88079e+09	-0.46
	AELVNNLGTIAR		[86-97]	1270.71	2.13684e+09	0.65
	AISNDWEEPLSTK		[290-302]	1489.72	1556648920	0.85
	YQSLTNQAVLGDESHLR		[46-62]	1930.96	1.53336e+09	0.78
	EVTQEFVVQNK		[257-267]	1320.68	1.2792e+09	0.06
	TLTVEDTGIGMTK		[73-85]	1365.69	1.06867e+09	-0.87
	DVTKEEYAAFYK		[278-289]	1463.71	9.27497e+08	0.56
	ELISNSSDACDK	1xCarbamidomethyl [C10]	[32-43]	1338.58	8.80136e+08	-1.94
	EDQQEYLEER		[177-186]	1338.58	8.04794e+08	0.03
	KLETSPFIEQAR		[476-487]	1418.76	7.87484e+08	0.2
	RAPFDMFEPSK		[321-331]	1324.64	7.47133e+08	-0.01
	LETSPFIEQAR		[477-487]	1290.67	6.60847e+08	1.06
	TLTVEDTGIGMTK	1xOxidation [M11]	[73-85]	1381.69	6.40277e+08	-0.01
	ALELFEEIAENKEDYKK		[395-411]	2069.04	5.94816e+08	0.56
	DVLGDKVEK		[552-560]	1002.55	5.28211e+08	-1.51
	RAPFDMFEPSK	1xOxidation [M6]	[321-331]	1340.63	4.95062e+08	0.78
	TMEINPAHPIVK		[608-619]	1349.72	4.8837e+08	-1.93
	FHSSESGEDMTTLK		[440-453]	1568.69	394681354	-0.52
	APFDMFEPSK		[322-331]	1168.53	3.49885e+08	-1.65
	ALELFEEIAENK		[395-406]	1405.72	2.87961e+08	0.56
	NEEGEEPKVEEVKDDAEEGEK		[228-248]	2389.05	2.53763e+08	-1.63
	KTMEINPAHPIVK	1xOxidation [M3]	[607-619]	1493.81	2.0706e+08	-1.7
	APFDMFEPSK	1xOxidation [M5]	[322-331]	1184.53	2.03504e+08	0.91
	HFSVEGQLEFR		[303-313]	1348.66	1.91619e+08	0.19
	CIYYVTGDSK	1xCarbamidomethyl [C1]	[465-474]	1205.55	1.77247e+08	-2.12
	DSSMSAYMMSK		[596-606]	1237.49	1.74034e+08	1.21
	KTMEINPAHPIVK		[607-619]	1477.82	1.52966e+08	-1.27
	EGVHFEETEEEK		[522-533]	1462.63	1.52361e+08	-0.85
	VTVVSK		[133-138]	632.398	152078260	-2.03
	VKEVTQEFVVQNK		[255-267]	1547.84	1.4792e+08	0.02
	EGVHFEETEEEKK		[522-534]	1590.73	1.3244e+08	-2.08
	RVEADENDK		[624-632]	1075.5	1.25508e+08	-0.84
	VEEVKDDAEEGEK		[236-248]	1476.67	1.24708e+08	-1.77
	KALELFEEIAENK		[394-406]	1533.82	8.38322e+07	0.2
	KKLETSPFIEQAR		[475-487]	1546.86	65653918	-0.68
	DSSMSAYMMSK	1xOxidation [M]	[596-606]	1253.48	6.06553e+07	0.09
	EGVHFEETEEEKKQR		[522-536]	1874.89	5.33406e+07	-0.58
	KLMELLR		[433-439]	902.549	5.22027e+07	-0.14
	VEEVKDDAEEGEKK		[236-249]	1604.76	5.13549e+07	-1.33
	ELISNSSDACDKIR	1xCarbamidomethyl [C10]	[32-45]	1607.77	4.60662e+07	-1.61
	VEADENDK		[625-632]	919.4	2.28747e+07	-1.21
	EVTDEDEDEAAAAK		[214-227]	1492.63	2.02388e+07	-2.27
	NEEGEEPKVEEVK		[228-240]	1515.72	1.87387e+07	-1.51
	VEADENDKAVK		[625-635]	1217.6	1.40374e+07	-1.86
	CIYYVTGDSKK	1xCarbamidomethyl [C1]	[465-475]	1333.65	1.34921e+07	-0.54
35/452	TcCLB.511211.170	Heat shock protein 70 (HSP70)	HSP70	37	201	6	48.01	5.57	677	69.23	2.88099e+09
	Sequence	Modifications	Position in Protein	Theo. MH+ [Da]	Area	DeltaM [ppm]
	DAGTIAGMEVLR		[161-172]	1232.63	8563271872	1.54
	TTPSYVAFTDTER		[37-49]	1487.7	8338294143	1.2
	AVVTVPAYFNDSQR		[143-156]	1566.79	6.89723e+09	0.38
	IINEPTAAAIAYGLDK		[173-188]	1659.9	6713571662	0.09
	FEELCGDLFR	1xCarbamidomethyl [C5]	[305-314]	1285.59	6418048669	-0.45
	NQVAMNPTNTVFDAK		[57-71]	1649.8	4.8693e+09	1.35
	TFNPEEVSSMVLSK		[114-127]	1567.77	4788425875	0.75
	VMQLVSDFFGGK		[349-360]	1327.67	4.19964e+09	0.15
	GDDKPVIQVQFR		[98-109]	1401.75	3.59863e+09	0.67
	NQIVITNDK		[502-510]	1044.57	3.53505e+09	0.59
	NTVNEPNVAGK		[554-564]	1142.58	3.41045e+09	0.62
	AVHDVVLVGGSTR		[333-345]	1309.72	3.32407e+09	-0.71
	EIAESYLGK		[130-138]	1009.52	3.30729e+09	0.68
	VMQLVSDFFGGK	1xOxidation [M2]	[349-360]	1343.67	2.47122e+09	0.66
	ELENLCTPIMTK	1xCarbamidomethyl [C6]	[601-612]	1448.71	2.21492e+09	0.31
	DAGTIAGMEVLR	1xOxidation [M8]	[161-172]	1248.63	1877808860	1
	NQVAMNPTNTVFDAK	1xOxidation [M5]	[57-71]	1665.79	1.57237e+09	0.87
	TFNPEEVSSMVLSK	1xOxidation [M10]	[114-127]	1583.76	1546771122	0.21
	LVSHFTDEFK		[239-248]	1222.61	1.41065e+09	2.11
	DCHLLGTFDLSGIPPAPR	1xCarbamidomethyl [C2]	[455-472]	1965.99	1.38177e+09	1.2
	FSDPVVQSDMK		[78-88]	1252.59	1.2978e+09	1.17
	KAVVTVPAYFNDSQR		[142-156]	1694.89	1.17661e+09	0.28
	NTTIPTK		[420-426]	774.436	8.75605e+08	-1.58
	ARFEELCGDLFR	1xCarbamidomethyl [C7]	[303-314]	1512.73	814267707	0.35
	ELENLCTPIMTK	1xCarbamidomethyl [C6]; 1xOxidation [M10]	[601-612]	1464.71	6.94138e+08	1.2
	NTTIPTKK		[420-427]	902.531	6.59632e+08	0.48
	IINEPTAAAIAYGLDKVEDGK		[173-193]	2188.15	5.47555e+08	0.13
	ATNGDTHLGGEDFDNR		[223-238]	1718.74	4.78937e+08	-0.1
	KFSDPVVQSDMK		[77-88]	1380.68	4.75763e+08	-1.85
	FSDPVVQSDMK	1xOxidation [M10]	[78-88]	1268.58	4.70015e+08	0.93
	LVSHFTDEFKR		[239-249]	1378.71	4.35027e+08	0.19
	MKEIAESYLGK		[128-138]	1268.66	3.5391e+08	0.34
	QKELENLCTPIMTK	1xCarbamidomethyl [C8]	[599-612]	1704.87	3.52406e+08	1.81
	MKEIAESYLGK	1xOxidation [M1]	[128-138]	1284.65	3.26894e+08	0.1
	RNTTIPTK		[419-426]	930.537	3.22423e+08	-0.43
	IINEPTAAAIAYGLDKVEDGKER		[173-195]	2473.29	3.11209e+08	0.32
	GKDLTTSQR		[253-261]	1005.53	2.82793e+08	1.02
	KFSDPVVQSDMK	1xOxidation [M11]	[77-88]	1396.68	1.86064e+08	0.85
	YEAQDKEQR		[528-536]	1166.54	1.715e+08	1.14
	NGLENYAFSMK		[543-553]	1273.59	1.1637e+08	0.98
	RNQIVITNDK		[501-510]	1200.67	9.76195e+07	-0.23
	SQIFSTYADNQPGVHIQVFEGER		[428-450]	2622.26	6.91359e+07	0.43
	VEIIANDQGSR		[26-36]	1201.62	3.94119e+07	0.99
	RAVHDVVLVGGSTR		[332-345]	1465.82	3.13529e+07	0.15
	GTLQPVER		[315-322]	899.495		-0.22
41/452	TCSYLVIO_003281	Heat shock 70 kDa protein, mithocondrial precursor	HSP70	33	112	33	46.56	6.13	655	67.29	4.77447e+09
	Sequence	Modifications	Position in Protein	Theo. MH+ [Da]	Area	DeltaM [ppm]
	DAGTIAGLNVIR		[181-192]	1199.67	7.1793e+09	0.9
	VVNEPTAAALAYGLDK		[193-208]	1631.86	3.68929e+09	0.09
	TTPSVVAFK		[60-68]	949.535	3.45483e+09	1.18
	VLENTEGFR		[51-59]	1064.54	2.96112e+09	-0.29
	STGIDLSNER		[267-276]	1091.53	2.65055e+09	0.58
	SKFESLAEK		[323-331]	1038.55	2.33855e+09	-2.08
	VSNAVVTCPAYFNDAQR	1xCarbamidomethyl [C8]	[160-176]	1911.9	1.93474e+09	-0.06
	SQTFSTAADNQTQVGIK		[443-459]	1795.88	1.78028e+09	0.09
	EISEVVLVGGMTR		[353-365]	1389.74	1.3186e+09	-0.07
	YVSDAEKENVR		[575-585]	1309.64	1.28948e+09	-2.7
	RFEDSNIQHDIK		[100-111]	1501.74	1.26669e+09	-1.28
	QAITNPQSTFFAVK		[81-94]	1551.82	1.22626e+09	0.4
	MKETAENFLGR		[148-158]	1295.64	1109827135	0.22
	ETAENFLGR		[150-158]	1036.51	1.06113e+09	0.34
	QYSPSQVGAFVLEK		[134-147]	1552.8	9.20148e+08	0
	SMENPNVTKDELSAATDK		[594-611]	1949.91	8.48686e+08	-0.27
	KVSNAVVTCPAYFNDAQR	1xCarbamidomethyl [C9]	[159-176]	2040	8.22433e+08	1.14
	DAAVDLK		[346-352]	731.393	8.12706e+08	-2.14
	EISEVVLVGGMTR	1xOxidation [M11]	[353-365]	1405.74	7.03584e+08	0.85
	NNAETQANTAER		[557-568]	1318.6	7.00283e+08	-0.56
	FEDSNIQHDIK		[101-111]	1345.64	630682071	-0.94
	TQNITITASGGLSK		[516-529]	1390.75	4.78737e+08	-0.91
	DELSAATDK		[603-611]	949.447	4.20183e+08	-1.19
	MKETAENFLGR	1xOxidation [M1]	[148-158]	1311.64	3.9343e+08	0.09
	SMENPNVTKDELSAATDK	1xOxidation [M2]	[594-611]	1965.91	2.93708e+08	-1.35
	KSMENPNVTKDELSAATDK	1xOxidation [M3]	[593-611]	2094	2.89207e+08	-2.69
	RQAITNPQSTFFAVK		[80-94]	1707.92	2.87391e+08	1.3
	DSESHAESDR		[538-547]	1132.45	2.74991e+08	-2.06
	KSMENPNVTKDELSAATDK		[593-611]	2078.01	2.18242e+08	-1.6
	GVNPDEAVALGAATLGGVLR		[384-403]	1880.02	2.16786e+08	1.1
	TLLAELRK		[586-593]	943.593	2.12898e+08	-0.82
	KSTGIDLSNER		[266-276]	1219.63	1.22553e+08	-0.98
	KSMENPNVTK		[593-602]	1147.58	8.32337e+07	-1.83
	SSNGDAWVQDANGK		[120-133]	1448.64	6.1685e+07	0.84
	EMAADNQMMGQFDLVGIPPAPR	2xOxidation [M2; M8]	[466-487]	2420.1	1.07512e+07	1.55
	MIRDSESHAESDR		[535-547]	1532.68	7.58719e+06	-2.16
	TLLAELR		[586-592]	815.499		-0.31
125/452	TcCLB.506207.50	IgE-dependent histamine-releasing factor	HRF	4	8	4	16.47	4.64	170	18.35	7.5196e+08
	Sequence	Modifications	Position in Protein	Theo. MH+ [Da]	Area	DeltaM [ppm]
	VVDVVHNNR		[68-76]	1051.56	1.10097e+09	-2.51
	FQANAAAFVK		[111-120]	1066.57	8.97887e+08	0.95
	NSYMAHIR		[85-92]	991.478	2.57028e+08	-1.09
	KFQANAAAFVK		[110-120]	1194.66	3.2431e+07	-0.17
131/452	TcCLB.509775.40	Iron superoxide dismutase	SODB	12	33	3	56.65	8.6	233	16.00	1.16461e+09
	Sequence	Modifications	Position in Protein	Theo. MH+ [Da]	Area	DeltaM [ppm]
	DGCAPVFSPR	1xCarbamidomethyl [C3]	[45-54]	1105.51	3.42171e+09	0.17
	LNALAGTTYDGK		[71-82]	1223.63	3.15083e+09	-1.4
	NQLVIDNTSNAGCPLTK	1xCarbamidomethyl [C13]	[169-185]	1844.92	2.72735e+09	-0.75
	RPDYLK		[208-213]	791.441	1.81276e+09	-2.92
	MHAQAIK	1xOxidation [M1]	[227-233]	814.424	1.98864e+08	-2.91
	MHAQAIK		[227-233]	798.429	1.62145e+08	-4.21
	AYVDKLNALAGTTYDGK		[66-82]	1799.92	1.44152e+08	-0.21
	SLESAVTAQFGSVEQFK		[127-143]	1827.91	1.06255e+08	-1.09
	GLFNQAAQHFNHTFYFR		[99-115]	2098	4.07813e+07	-0.82
	QMELHYTK		[55-62]	1049.51	3.13501e+07	-2.89
	GLRPVLAVDVWEHAYYK		[186-202]	2016.07	2.68614e+07	-0.7
	SIEEIILAVANDAEK		[83-97]	1614.86	1.8079e+07	-0.33
	SIEEIILAVANDAEKK		[83-98]	1742.95	1.36332e+07	-0.79
131/452	TcCLB.506207.50	IgE-dependent histamine-releasing factor	HRF	6	16	6	21.18	4.64	170	16.00	1.82113e+09
	Sequence	Modifications	Position in Protein	Theo. MH+ [Da]	Area	DeltaM [ppm]
	VVDVVHNNR		[68-76]	1051.56	2.30881e+09	-3.99
	FQANAAAFVK		[111-120]	1066.57	1.92856e+09	-1.11
	YTETSYDK		[77-84]	1006.44	1.22602e+09	-2.72
	NSYMAHIR		[85-92]	991.478	8.85378e+08	-2.26
	YTETSYDKNSYMAHIR	1xOxidation [M12]	[77-92]	1994.89	1.46437e+08	-2.23
	KFQANAAAFVK		[110-120]	1194.66	1.08977e+08	-1.5
	YTETSYDKNSYMAHIR		[77-92]	1978.9	6.9197e+07	-1.46
140/452	TcCLB.503.899.130	Glutathione peroxidase-like protein	GPX	8	19	8	39.33	6	178	8.47	1.004e+09
	Sequence	Modifications	Position in Protein	Theo. MH+ [Da]	Area	DeltaM [ppm]
	GGYETATTLYNK		[50-61]	1317.63	1.17184e+09	-0.55
	AHPLYSYLK		[113-121]	1091.59	9.20414e+08	0.35
	GHPLLIYNVASR		[33-44]	1339.75	9.19746e+08	1.56
	HGVPVAR		[145-151]	735.426	5.41677e+08	0.39
	CLTGSAGVQAIK	1xCarbamidomethyl [C1]	[123-134]	1204.64	1.55333e+08	-0.92
	WNFTSFLIDR		[135-144]	1298.65	7.11143e+07	0.53
	IDVNGDK		[106-112]	760.384	7.10841e+07	-1.88
	RCLTGSAGVQAIK	1xCarbamidomethyl [C2]	[122-134]	1360.74	1.14389e+07	0.06
105/452	TcCLB.503855.20	Spermidine synthase	SPSYN	9	36	1	35.14	5.41	296	27.61	2.85807e+09
	Sequence	Modifications	Position in Protein	Theo. MH+ [Da]	Area	DeltaM [ppm]
	VLIIGGGDGGVLR		[91-103]	1225.73	3.92731e+09	1.15
	VDDGLAFVR		[147-155]	991.521	2.85807e+09	1.62
	ASFALPR		[281-287]	761.43	1.58926e+09	-1.1
	VLYDAPTK		[31-38]	906.493	1.32953e+09	-0.76
	FQHLTIFESDPK		[39-50]	1461.74	8.02723e+08	0.9
	AGVDVTKPLRPVEDMPFAK	1xOxidation [M15]	[251-269]	2086.1	4.22014e+08	-0.03
	KAGVDVTKPLRPVEDMPFAK	1xOxidation [M16]	[250-269]	2214.2	297908022	-0.8
	EENDQWPGQAMSLR		[14-27]	1660.74	2.91832e+08	2.53
	EENDQWPGQAMSLR	1xOxidation [M11]	[14-27]	1676.73	2.27218e+08	1.25
	AGVDVTKPLRPVEDMPFAK		[251-269]	2070.11	2.16561e+08	0.19
	KAGVDVTKPLRPVEDMPFAK		[250-269]	2198.2	1.18023e+08	2.07
	HGTVEHCDLVDIDGEVMEQSK	1xOxidation [M17]; 1xCarbamidomethyl [C7]	[108-128]	2414.06	1.1802e+08	0.93
	HGTVEHCDLVDIDGEVMEQSK	1xCarbamidomethyl [C7]	[108-128]	2398.06	7.98958e+07	1.97
140/452	TcCLB.503715.30	Ras-related protein RAB1A	RAB1A	3	5	3	15.71	7.77	210	8.47	1.82683e+08
	Sequence	Modifications	Position in Protein	Theo. MH+ [Da]	Area	DeltaM [ppm]
	IIILGDSGVGK		[11-21]	1071.64	3.25762e+08	2.24
	EASNVEEAFTR		[154-164]	1252.58	1.19157e+08	1.71
	LQIWDTAGQER		[59-69]	1316.66	1.03131e+08	2.88
143/452	TcCLB.511407.60	Small GTP-binding protin RAB11	RAB11	7	30	7	43.78	8.13	217	3.36	1.90816e+09
	Sequence	Modifications	Position in Protein	Theo. MH+ [Da]	Area	DeltaM [ppm]
	VVIIGDSGVGK		[10-20]	1043.61	2.15523e+09	0.59
	VFVPATCSIFLIGNK	1xCarbamidomethyl [C7]	[107-121]	1665.9	1.78839e+09	1.08
	SVYDLVVAPVDAAGGR		[167-182]	1588.83	1.78086e+09	0.22
	VQIWDTAGQER		[58-68]	1302.64	1061170600	1.81
	ENGLSFLETSALEK		[141-154]	1537.77	4.70282e+08	1.85
	YTANEFSQDTPATIGVEFMTK		[27-47]	2350.09	6.24313e+07	1.81
	YTANEFSQDTPATIGVEFMTK	1xOxidation [M19]	[27-47]	2366.09	51249999	1.17
	CDLEHLR	1xCarbamidomethyl [C1]	[122-128]	942.446	3.08894e+07	-1.24
59/PR150	TCSYLVIO_005562	Hypothetical protein	-	19	70	19	50.21	5.86	484	48.66	1.89655e+09
	Sequence	Modifications	Position in Protein	Theo. MH+ [Da]	Area	DeltaM [ppm]
	LDEIFGNVR		[150-158]	1062.56	2.25434e+09	1.56
	TLGETVLEPK		[174-183]	1086.6	1.93906e+09	-0.28
	SYLGLETLGNDK		[371-382]	1309.66	1.49624e+09	1.27
	ELGEEVVDDCIR	1xCarbamidomethyl [C10]	[419-430]	1433.66	1.01547e+09	0.14
	GFETQPVCMAR	1xCarbamidomethyl [C8]	[261-271]	1295.59	8.30664e+08	1.02
	DLMDGNIEAEEVPR		[350-363]	1587.73	7.23464e+08	1.2
	IWQHGSSLTTDELLR		[445-459]	1755.9	696888328	1.4
	EKNDFAGFLPTLK		[100-112]	1479.78	5.86194e+08	0.34
	LAEYFGDQPAFTSSNMK		[301-317]	1905.87	5.07393e+08	0.49
	DLMDGNIEAEEVPR	1xOxidation [M3]	[350-363]	1603.73	4.51697e+08	0.93
	LAEYFGDQPAFTSSNMK	1xOxidation [M16]	[301-317]	1921.86	442845165	0.08
	LDVSAHPFCGNSK	1xCarbamidomethyl [C9]	[211-223]	1431.67	4.40081e+08	-0.7
	INADELCYPLHVMLR	1xCarbamidomethyl [C7]	[330-344]	1843.92	2.73252e+08	0.87
	SLGVHEGQSLFAEMQIGR	1xOxidation [M14]	[272-289]	1974.97	2.00291e+08	0.12
	QATGETLNPEHYR		[460-472]	1515.72	1.95087e+08	-0.35
	RELGEEVVDDCIR	1xCarbamidomethyl [C11]	[418-430]	1589.76	1.90688e+08	-0.59
	HPYEALVDIYEPGMTLQR	1xOxidation [M14]	[132-149]	2148.04	1.71801e+08	1.53
	INADELCYPLHVMLR	1xOxidation [M13]; 1xCarbamidomethyl [C7]	[330-344]	1859.91	1.57396e+08	1.2
	HPYEALVDIYEPGMTLQR		[132-149]	2132.05	1.22101e+08	2.28
	SLGVHEGQSLFAEMQIGR		[272-289]	1958.98	7.58869e+07	-0.66
	SGAFMEFLAPR		[290-300]	1225.6	4.32949e+07	1.92
	SGAFMEFLAPR	1xOxidation [M5]	[290-300]	1241.6	3.03243e+07	0.78
	ELGEEVVDDCIRK	1xCarbamidomethyl [C10]	[419-431]	1561.75	2.41713e+07	0.76
	AWELENLLPEEFVER		[69-83]	1873.93	2.08988e+07	0.31
	ITTNYTETGFVTSLLGVIHETGHAK		[228-252]	2689.38	1.83255e+07	0.19
108/PR150	TCSYLVIO_001046	Peptidase M20/M25/M40	MT2598	8	26	8	17.78	5.43	478	27.61	1.49258e+09
	Sequence	Modifications	Position in Protein	Theo. MH+ [Da]	Area	DeltaM [ppm]
	LWLTTALR		[202-209]	973.583	1923792916	0.82
	AMDVIVEWVK	1xOxidation [M2]	[50-59]	1205.62	1375445644	-0.52
	VPEAHCAIPEAVVK	1xCarbamidomethyl [C6]	[258-271]	1519.79	1.17851e+09	-2.07
	QPPLPPWDEGLHPQK		[103-117]	1738.89	3.6723e+08	-0.34
	VEDQTTGEVKVPEAHCAIPEAVVK	1xCarbamidomethyl [C16]	[248-271]	2606.31	2.32388e+08	1.87
	GAADDGYAIFSTLTALAAVQK		[129-149]	2083.07	1.88804e+08	0.87
	AMDVIVEWVK		[50-59]	1189.63	1.53888e+08	2.39
	VEDQTTGEVK		[248-257]	1105.54		-0.11
	YEVLEEK		[68-74]	909.456		-0.92
137/PR150	TcCLB.507639.40	Proteasome beta 5 subunit	PSMB5	9	23	9	27.01	5.9	311	13.47	1.07775e+09
	Sequence	Modifications	Position in Protein	Theo. MH+ [Da]	Area	DeltaM [ppm]
	NLTVEEACELAR	1xCarbamidomethyl [C8]	[256-267]	1404.68	1.33439e+09	0.44
	ILANITYSYR		[192-201]	1213.66	1.0141e+09	0.98
	SIFHATYR		[269-276]	994.51	884770429	-0.93
	ASSGQYISSQTVMK		[130-143]	1486.72	7.49279e+08	-0.65
	ISVAAASK		[184-191]	746.441	5.56609e+08	-3.05
	ASSGQYISSQTVMK	1xOxidation [M13]	[130-143]	1502.72	4.95019e+08	-0.8
	VLGMECR	1xCarbamidomethyl [C6]	[168-174]	864.407	4.07869e+08	-0.44
	DGASGGIVTVYHVHQGGWTQISR		[277-299]	2425.2	100783100	0.32
	RSIFHATYR		[268-276]	1150.61	6.16814e+07	-1.38
	KNLTVEEACELAR	1xCarbamidomethyl [C9]	[255-267]	1532.77	5.80279e+07	-0.04
127/452	TCSYLVIO_005774	Proteasome beta 2 subunit	PSMB2	9	31	9	24.66	9.19	292	18.35	1.47659e+09
	Sequence	Modifications	Position in Protein	Theo. MH+ [Da]	Area	DeltaM [ppm]
	EGVVLGADTR		[76-85]	1016.54	1.71055e+09	-1.8
	ELVASAIR		[219-226]	858.504	1698971037	-4.43
	ATEGSIVADKR		[86-96]	1146.61	1.02023e+09	-2.83
	VHEALTMLK	1xOxidation [M7]	[142-150]	1057.57	7.6477e+08	-3.07
	TELLIGYDKPNER		[249-261]	1547.81	7.56021e+08	-0.33
	TKTELLIGYDKPNER		[247-261]	1776.95	7.01814e+08	-2.28
	VHEALTMLK		[142-150]	1041.58	5.92706e+08	-2.84
	ENMTLEEAK		[210-218]	1064.49	3.73623e+08	-2.07
	ATEGSIVADK		[86-95]	990.51	3.72827e+08	-2.32
	FPPGTTPVLR		[270-279]	1084.61	3.16792e+08	-0.26
	ENMTLEEAK	1xOxidation [M3]	[210-218]	1080.49	2.67437e+08	-2.08
137/452	TcCLB.507639.40	Proteasome beta 5 subunit	PSMB5	9	24	9	27.01	5.9	311	13.47	1.21108e+09
	Sequence	Modifications	Position in Protein	Theo. MH+ [Da]	Area	DeltaM [ppm]
	NLTVEEACELAR	1xCarbamidomethyl [C8]	[256-267]	1404.68	1.46913e+09	-1.39
	SIFHATYR		[269-276]	994.51	1.12341e+09	-2.71
	ILANITYSYR		[192-201]	1213.66	1.0407e+09	-1.74
	ASSGQYISSQTVMK		[130-143]	1486.72	8.89084e+08	-2.13
	ISVAAASK		[184-191]	746.441	7.71719e+08	-3.13
	ASSGQYISSQTVMK	1xOxidation [M13]	[130-143]	1502.72	7.33562e+08	-2.05
	VLGMECR	1xCarbamidomethyl [C6]	[168-174]	864.407	4.67986e+08	-2
	RSIFHATYR		[268-276]	1150.61	1.02234e+08	-2.73
	KNLTVEEACELAR	1xCarbamidomethyl [C9]	[255-267]	1532.77	6.34462e+07	0.17
	DGASGGIVTVYHVHQGGWTQISR		[277-299]	2425.2	4.73688e+07	-1.19
24/PR150	TCSYLVIO_008551	Pyruvate phosphate dikinase	PPDK	15	27	3	37.18	6.73	355	75.05	3.21354e+07
	Sequence	Modifications	Position in Protein	Theo. MH+ [Da]	Area	DeltaM [ppm]
	FGDVENPLLFSVR		[85-97]	1492.78	5.61588e+07	-2.04
	SATGVAFSR		[256-264]	895.463	5.3312e+07	-2.68
	FVYDSYR		[134-140]	949.441	3.67444e+07	-2.46
	FDTDLTAK		[173-180]	910.452	3.13396e+07	-3.14
	TPQQIGQSLSLR		[292-303]	1327.73	29447360	-2.3
	GHGVSEEERR		[307-316]	1155.55	8.11203e+06	-1.5
	ATAEAWIR		[119-126]	917.484	3.78162e+06	-2.67
	FVYYFGGQK		[6-14]	1108.55	2.14058e+06	-1.56
	AKLENHYR		[338-345]	1030.54	2.01482e+06	-1.5
	HRYPSMEETMPENYR		[317-331]	1939.84	1.69746e+06	-3.58
	KFVYYFGGQK		[5-14]	1236.64	1.30303e+06	-1.59
	ELTEEYLVLFQR		[184-195]	1539.81	691975	-2.05
	YPSMEETMPENYR		[319-331]	1646.68	554021	-1.62
	GLPQEVVEQVK		[61-71]	1225.68		-1.23
	RVEADMGTK		[76-84]	1006.5		-1.96
42/PR150	TCSYLVIO_004608	Phosphoglycerate mutase	PGMI	29	117	29	66.43	5.92	554	66.00	1.68685e+09
	Sequence	Modifications	Position in Protein	Theo. MH+ [Da]	Area	DeltaM [ppm]
	VALQGASLVDDAIK		[87-100]	1399.78	2.08436e+09	0.51
	FTDDLESVLEK		[176-186]	1295.64	1.60697e+09	1.4
	TGEIFTSDGYR		[101-111]	1245.57	1.36921e+09	0.61
	AFASASEAIK		[231-240]	994.52	1.10552e+09	-0.08
	VLPLTSHTLAPVPVFIGGAGLDAR		[490-513]	2401.36	8.91119e+08	1.33
	EITEAAIEALK		[400-410]	1187.65	8.11153e+08	0.71
	LHVLYDGR		[159-166]	972.526	8.06647e+08	-0.35
	TPFIDSMCADAK	1xCarbamidomethyl [C8]	[41-52]	1355.6	7.69361e+08	0.34
	AQVLGEAR		[223-230]	843.468	7.51855e+08	-1.14
	TLHLIGLLSDGGVHSR		[123-138]	1674.93	7.40426e+08	0.31
	LDEEHETFFEIPSDR		[373-387]	1863.84	7.18914e+08	1.06
	YLHGAFSQPGR		[112-122]	1232.62	7.0599e+08	-1.02
	YEADWSVVER		[210-219]	1253.58	700712446	1.32
	AFEEEDFDKFNR		[292-303]	1546.68	6.7679e+08	1.43
	GKPILGNDGK		[480-489]	998.563	637102156	-3.41
	YDGDLGIPNNFLVPPPR		[317-333]	1883.97	5.18392e+08	0.51
	SKEITEAAIEALK		[398-410]	1402.78	4.94612e+08	1.09
	KEDPNVSDQYYPPFIISDVDGK		[244-265]	2526.2	4.52266e+08	0.99
	MFVTMDR		[203-209]	899.411	4.00803e+08	-0.55
	SGKLDEEHETFFEIPSDR		[370-387]	2135.99	3.64498e+08	0.63
	TPFIDSMCADAK	1xCarbamidomethyl [C8]; 1xOxidation [M7]	[41-52]	1371.59	3.4661e+08	-0.58
	TSEEYLVGSGCNIFACSETQK	2xCarbamidomethyl [C11; C16]	[337-357]	2380.04	3.37048e+08	0.05
	VQFNEKPLMK		[388-397]	1233.67	3.17036e+08	-1.4
	SVCAHGTAVGLPTDADMGNSEVGHNALGSGR	1xCarbamidomethyl [C3]; 1xOxidation [M17]	[56-86]	3053.38	2.33666e+08	-2.46
	VQFNEKPLMK	1xOxidation [M9]	[388-397]	1249.66	2.16964e+08	-0.28
	SVCAHGTAVGLPTDADMGNSEVGHNALGSGR	1xCarbamidomethyl [C3]	[56-86]	3037.39	1.80605e+08	0.46
	MFVTMDR	1xOxidation [M1]	[203-209]	915.406	1.04609e+08	-1.79
	EAVDAVNGVFLITADHGNSDDMAQR	1xOxidation [M22]	[452-476]	2661.22	1.00195e+08	2.22
	DNQLYEIINHASSNGAK		[139-155]	1873.9	9.77032e+07	-0.08
	EAVDAVNGVFLITADHGNSDDMAQR		[452-476]	2645.23	59045478	1.58
	EDPNVSDQYYPPFIISDVDGK		[245-265]	2398.11	2.62084e+07	1.29
	KGKPILGNDGK		[479-489]	1126.66	2.59413e+07	-1.41
	AIGPIEDGDAVLCFNFR	1xCarbamidomethyl [C13]	[266-282]	1893.92	2.56996e+07	0.17
	FGHVTYFWNGNR		[358-369]	1497.7	17190798	0.48
51/PR150	TCSYLVIO_007745	Glycosomal phosphoenolpyruvate carboxykinase	PEPCK	29	114	29	55.81	8.37	525	62.76	2.13663e+09
	Sequence	Modifications	Position in Protein	Theo. MH+ [Da]	Area	DeltaM [ppm]
	GVFNIEGGCYAK	1xCarbamidomethyl [C9]	[250-261]	1314.61	2.41379e+09	1.09
	TGEIDFYDESICK	1xCarbamidomethyl [C12]	[292-304]	1576.68	2.09337e+09	-0.34
	VWLLNTGYAGGR		[410-421]	1306.69	1902719736	1.67
	VAYPLSHIEGALSK		[308-321]	1484.81	1.88627e+09	-0.11
	HATFYGEQLAEK		[391-402]	1393.67	1.85861e+09	-1.35
	EHLFVVDCFAGHDER	1xCarbamidomethyl [C8]	[89-103]	1830.82	1.77486e+09	0.33
	AIIDAIHDGTLDR		[436-448]	1409.74	1.74298e+09	1.95
	LSEESFAR		[69-76]	938.458	1.33936e+09	-0.23
	IVDTDDVR		[50-57]	932.468	1.1766e+09	-1.48
	GALAVMSYAK		[31-40]	1010.53	1.10263e+09	0.54
	VPEHLLNPR		[468-476]	1074.61	1.07608e+09	-3.45
	EQVILGTEYAGEMK		[172-185]	1567.77	1.0704e+09	1.88
	FGAVAENCVLDKR	1xCarbamidomethyl [C8]	[279-291]	1478.74	8.97018e+08	-1.08
	TTLSADPHR		[228-236]	997.506	8.85069e+08	-2.5
	TEKDIYDAVR		[269-278]	1209.61	8.33175e+08	-0.89
	TEYEEYPGWGLHIPK		[449-463]	1818.87	781126260	1.11
	FGAVAENCVLDK	1xCarbamidomethyl [C8]	[279-290]	1322.64	6.82049e+08	1.02
	NLIGDDEHVWTDR		[237-249]	1569.73	664863069	0.4
	GALAVMSYAK	1xOxidation [M6]	[31-40]	1026.53	4.363e+08	-0.58
	EQVILGTEYAGEMK	1xOxidation [M13]	[172-185]	1583.76	3.11404e+08	1.22
	EQVILGTEYAGEMKK	1xOxidation [M13]	[172-186]	1711.86	2.28493e+08	-1.44
	NLLSPELVQWALK		[8-20]	1510.86	2.12297e+08	0.6
	NVIFLTNDAFGVMPPVAR		[329-346]	1961.03	1.18987e+08	-0.14
	NVIFLTNDAFGVMPPVAR	1xOxidation [M13]	[329-346]	1977.03	1.15428e+08	0.64
	TARPIFSSCFGGPFLVR	1xCarbamidomethyl [C9]	[374-390]	1911.99	4.27055e+07	2.51
	VFTTRPYHALFMR		[110-122]	1638.86	3.2848e+07	-0.15
	TREQVILGTEYAGEMKK	1xOxidation [M15]	[170-186]	1969.01	2.77551e+07	-2.11
	ELVAMFQESFSAR		[491-503]	1514.73	2.6689e+07	-1.31
	ELVAMFQESFSAR	1xOxidation [M5]	[491-503]	1530.73	2.47907e+07	1.15
	QGDVTVFFGLSGTGK		[213-227]	1512.77	2.30646e+07	2.29
	EQVILGTEYAGEMKK		[172-186]	1695.86	1.79292e+07	5.99
	TREQVILGTEYAGEMK		[170-185]	1824.92	1.33284e+07	0.49
	RIVDTDDVR		[49-57]	1088.57	1.25097e+07	-1.19
	RTGEIDFYDESICK	1xCarbamidomethyl [C13]	[291-304]	1732.78	5772745	0.09
99/PR150	TCSYLVIO_002700	Cytosolic malate dehydrogenase	MDH	9	49	9	35.24	6.73	332	34.45	6.17493e+09
	Sequence	Modifications	Position in Protein	Theo. MH+ [Da]	Area	DeltaM [ppm]
	SLALVAER		[167-174]	858.504	7247169646	3.03
	LLGELASK		[118-125]	830.498	5.9772e+09	0.76
	NAAIFSEHGR		[108-117]	1101.54	5.30041e+09	-1.14
	AELMDCAFPLLDR	1xOxidation [M4]; 1xCarbamidomethyl [C6]	[58-70]	1566.73	2.4888e+09	2.17
	NVSALTR		[155-161]	760.431	2369358592	-2.3
	HLAATTK		[312-318]	741.425	1.22178e+09	-2.34
	NCIIWGNHSGTQVPDVNSATVR	1xCarbamidomethyl [C2]	[184-205]	2425.17	1.0733e+09	0.8
	AELMDCAFPLLDR	1xCarbamidomethyl [C6]	[58-70]	1550.73	7.44183e+08	-1.48
	EAIKDDAYLDGEFMTTVQQR		[211-230]	2330.1	2.34235e+07	2.04
	VVVSGAAGQVGYALLPLIAGGR		[10-31]	2068.19	1.65974e+07	2.18
106/PR150	TcCLB.510105.230	Glyceraldehyde 3-phophate dehydrogenase	GAPDH	18	53	18	47.93	8.46	338	28.07	4.41604e+09
	Sequence	Modifications	Position in Protein	Theo. MH+ [Da]	Area	DeltaM [ppm]
	GAAQNIIPSATGAAK		[205-219]	1369.74	7.29636e+09	-0.41
	VPTPNVSVVDLTAR		[239-252]	1467.82	3.65032e+09	1.17
	LISWYDNETGYSHK		[314-327]	1712.79	2301447390	0.9
	YGGMVEVR		[60-67]	910.445	1756057707	-2.01
	LTGMAFR		[232-238]	795.418	1.53984e+09	2.11
	VTSERDPANLK		[80-90]	1229.65	1.43804e+09	-1.16
	YGGMVEVR	1xOxidation [M4]	[60-67]	926.44	1.13517e+09	-0.7
	AASEGELK		[268-275]	804.41	9.38689e+08	-2.65
	GQEIVSNASCTTNCLAPLAK	2xCarbamidomethyl [C10; C14]	[147-166]	2134.03	7.69072e+08	1.23
	TVDGPSQK		[191-198]	831.421	4.10255e+08	-2.75
	HIQAGAK		[115-121]	724.41	3.8327e+08	-1.89
	YDSTHGR		[53-59]	835.369	3.79155e+08	-0.43
	VVMTGPPK		[123-130]	828.465	373803250	-1.49
	KVVMTGPPK		[122-130]	956.56	3.16826e+08	-1.54
	IGINGFGR		[11-18]	833.463	3.11734e+08	0.52
	EGALVVNGK		[68-76]	886.499	2.79405e+08	-1.93
	VVMTGPPK	1xOxidation [M3]	[123-130]	844.46	2.51514e+08	-2.96
	KVVMTGPPK	1xOxidation [M4]	[122-130]	972.555	2.23261e+08	-2.81
	KHIQAGAK		[114-121]	852.505	1.92036e+08	0.62
	DPANLK		[85-90]	657.357	1.88061e+08	-3.34
	DDTPMFVMGVNNTMYK	2xOxidation [M8; M]	[131-146]	1894.8	1.68e+08	1.13
	DDTPMFVMGVNNTMYK	3xOxidation [M5; M8; M14]	[131-146]	1910.8	1.62194e+08	1.87
	DDTPMFVMGVNNTMYK	1xOxidation [M]	[131-146]	1878.81	4.34361e+07	2.01
42/452	TCSYLVIO_004608	Phosphoglycerate mutase	PGMI	26	78	26	61.01	5.92	554	66.00	6.70679e+08
	Sequence	Modifications	Position in Protein	Theo. MH+ [Da]	Area	DeltaM [ppm]
	FTDDLESVLEK		[176-186]	1295.64	9.55302e+08	0.65
	TGEIFTSDGYR		[101-111]	1245.57	6.08264e+08	0.9
	EITEAAIEALK		[400-410]	1187.65	4.48472e+08	0.81
	TPFIDSMCADAK	1xCarbamidomethyl [C8]	[41-52]	1355.6	3.97493e+08	0.43
	LHVLYDGR		[159-166]	972.526	3.81814e+08	-0.72
	AFASASEAIK		[231-240]	994.52	3.36035e+08	-0.75
	YLHGAFSQPGR		[112-122]	1232.62	3.31541e+08	-0.87
	AFEEEDFDKFNR		[292-303]	1546.68	3.2754e+08	1.55
	LDEEHETFFEIPSDR		[373-387]	1863.84	3.2226e+08	1.65
	AQVLGEAR		[223-230]	843.468	3.18474e+08	-1.21
	YEADWSVVER		[210-219]	1253.58	3.12603e+08	1.61
	VALQGASLVDDAIK		[87-100]	1399.78	3.11629e+08	0.51
	SKEITEAAIEALK		[398-410]	1402.78	2.4358e+08	0.66
	TLHLIGLLSDGGVHSR		[123-138]	1674.93	2.36924e+08	1.37
	MFVTMDR		[203-209]	899.411	1.77642e+08	-0.75
	VQFNEKPLMK		[388-397]	1233.67	1.70706e+08	-1.03
	TPFIDSMCADAK	1xOxidation [M7]; 1xCarbamidomethyl [C8]	[41-52]	1371.59	1.60808e+08	-0.14
	SGKLDEEHETFFEIPSDR		[370-387]	2135.99	1.3484e+08	0.46
	VLPLTSHTLAPVPVFIGGAGLDAR		[490-513]	2401.36	1.16887e+08	1.25
	TSEEYLVGSGCNIFACSETQK	2xCarbamidomethyl [C11; C16]	[337-357]	2380.04	1.15606e+08	-0.78
	SVCAHGTAVGLPTDADMGNSEVGHNALGSGR	1xOxidation [M17]; 1xCarbamidomethyl [C3]	[56-86]	3053.38	9.90111e+07	-2.38
	YDGDLGIPNNFLVPPPR		[317-333]	1883.97	9.50665e+07	0.9
	KEDPNVSDQYYPPFIISDVDGK		[244-265]	2526.2	7.42555e+07	1.86
	AFEEEDFDK		[292-300]	1129.47	6.28686e+07	0.34
	GKPILGNDGK		[480-489]	998.563	6.21896e+07	-2.15
	DNQLYEIINHASSNGAK		[139-155]	1873.9	6.15913e+07	0.57
	MFVTMDR	1xOxidation [M1]	[203-209]	915.406	5.9242e+07	-1.92
	SVCAHGTAVGLPTDADMGNSEVGHNALGSGR	1xCarbamidomethyl [C3]	[56-86]	3037.39	4.13345e+07	0.11
	EAVDAVNGVFLITADHGNSDDMAQR	1xOxidation [M22]	[452-476]	2661.22	3.42211e+07	0.5
	EAVDAVNGVFLITADHGNSDDMAQR		[452-476]	2645.23	6.56678e+06	0.89
51/452	TcCLB.507547.90	Glycosomal phosphoenolpyruvate carboxykinase	PEPCK	18	35	18	38.86	8.37	525	62.76	1.25522e+08
	Sequence	Modifications	Position in Protein	Theo. MH+ [Da]	Area	DeltaM [ppm]
	GVFNIEGGCYAK	1xCarbamidomethyl [C9]	[250-261]	1314.61	1.43803e+08	1.28
	TGEIDFYDESICK	1xCarbamidomethyl [C12]	[292-304]	1576.68	1.24194e+08	0.67
	VWLLNTGYAGGR		[410-421]	1306.69	1.0857e+08	0.92
	LSEESFAR		[69-76]	938.458	1.08063e+08	-0.49
	IVDTDDVR		[50-57]	932.468	8.70453e+07	-0.63
	AIIDAIHDGTLDR		[436-448]	1409.74	7.58436e+07	1.23
	VPEHLLNPR		[468-476]	1074.61	6.60119e+07	0.29
	HATFYGEQLAEK		[391-402]	1393.67	6.55413e+07	0.58
	FGAVAENCVLDKR	1xCarbamidomethyl [C8]	[279-291]	1478.74	59244682	0.89
	TEKDIYDAVR		[269-278]	1209.61	5.24837e+07	-0.49
	VAYPLSHIEGALSK		[308-321]	1484.81	4.75607e+07	1.03
	TTLSADPHR		[228-236]	997.506	4.65529e+07	-0.85
	FGAVAENCVLDK	1xCarbamidomethyl [C8]	[279-290]	1322.64	3.60229e+07	1.02
	EHLFVVDCFAGHDER	1xCarbamidomethyl [C8]	[89-103]	1830.82	2.93341e+07	2.03
	EQVILGTEYAGEMKK	1xOxidation [M13]	[172-186]	1711.86	2.19795e+07	0.7
	NLIGDDEHVWTDR		[237-249]	1569.73	1.73914e+07	1.38
	GALAVMSYAK		[31-40]	1010.53	1.05853e+07	2.35
	NVIFLTNDAFGVMPPVAR	1xOxidation [M13]	[329-346]	1977.03	9.6552e+06	1.81
106/452	TcCLB.510105.230	Glyceraldehyde 3-phophate dehydrogenase	GAPDH	19	39	19	55.92	8.46	338	28.07	2.11725e+09
	Sequence	Modifications	Position in Protein	Theo. MH+ [Da]	Area	DeltaM [ppm]
	VPTPNVSVVDLTAR		[239-252]	1467.82	3.29788e+09	2
	GAAQNIIPSATGAAK		[205-219]	1369.74	2239839965	-0.5
	AGISLNDR		[303-310]	845.448	814022336	0.58
	LISWYDNETGYSHK		[314-327]	1712.79	809984642	1.11
	YGGMVEVR		[60-67]	910.445	6.39989e+08	-0.27
	LTGMAFR		[232-238]	795.418	5.36219e+08	1.19
	VTSERDPANLK		[80-90]	1229.65	5.24478e+08	-1.35
	GQEIVSNASCTTNCLAPLAK	2xCarbamidomethyl [C10; C14]	[147-166]	2134.03	4.58306e+08	1.23
	YGGMVEVR	1xOxidation [M4]	[60-67]	926.44	4.46653e+08	-0.83
	LERPATYEQICAAIK	1xCarbamidomethyl [C11]	[253-267]	1762.92	4.22796e+08	-0.21
	AASEGELK		[268-275]	804.41	3.59814e+08	-1.89
	TVDGPSQK		[191-198]	831.421	1.66657e+08	0.92
	HIQAGAK		[115-121]	724.41	1.63263e+08	0.3
	VVMTGPPK		[123-130]	828.465	1.39955e+08	-0.76
	IGINGFGR		[11-18]	833.463	1.11015e+08	0.74
	EGALVVNGK		[68-76]	886.499	1.01347e+08	0.2
	KHIQAGAK		[114-121]	852.505	9.57019e+07	0.62
	KVVMTGPPK	1xOxidation [M4]	[122-130]	972.555	8.20114e+07	0.01
	DDTPMFVMGVNNTMYK		[131-146]	1862.81	2.6679e+07	2.11
	VLDLVAYISAH		[328-338]	1200.66	2.37006e+07	1.2
34/PR150	TCSYLVIO_003291	Tetrahydrofolate synthase	MTHFD1	10	12	10	16.67	7.68	624	69.23	2.26081e+06
	Sequence	Modifications	Position in Protein	Theo. MH+ [Da]	Area	DeltaM [ppm]
	EGCSNLIR	1xCarbamidomethyl [C3]	[420-427]	948.457	3.20652e+06	-0.61
	ATQNVQVDFR		[493-502]	1177.6	1.86892e+06	-0.53
	RLTAELK		[176-182]	830.509	1.70698e+06	-2.18
	TQYSFSHDPSLR		[556-567]	1437.68	1.24207e+06	-1.08
	TQSDEALYR		[167-175]	1082.51	1.18087e+06	0.23
	GGAGAVELAEAVIR		[479-492]	1312.72	1.1364e+06	-0.35
	NFTPIMR		[183-189]	878.455	961409	0.17
	GAPTGFIVPIR		[568-578]	1127.66	945852	1.08
	ASGLKPDGAVVVATVR		[382-397]	1539.89	681496	-0.26
	AGIENVEAVR		[410-419]	1057.56	219908	0.34
46/452	TcCLB.508731.60	Adenylosuccinate synthetase	ADSS	23	38	7	45.13	8.21	616	63.46	1.81893e+08
	Sequence	Modifications	Position in Protein	Theo. MH+ [Da]	Area	DeltaM [ppm]
	LLDLLASAPNSSTLK		[190-204]	1542.87	2.90175e+08	1.24
	GLSDADVLR		[250-258]	945.5	1.9626e+08	0.9
	AGEAVPGEAALYYCHPIVK	1xCarbamidomethyl [C14]	[541-559]	2045.02	1.68973e+08	1.38
	LDHIFNDQSVLR		[221-232]	1456.75	1.3716e+08	1.6
	DIDTYFGFLK		[238-247]	1218.6	1.11468e+08	0.85
	FVFNLAPSGLLSK		[128-140]	1392.79	1.01115e+08	0.13
	TVNAVANHPGCTFIAR	1xCarbamidomethyl [C11]	[94-109]	1727.86	8.65304e+07	0.56
	YNIGVAMAVASSR	1xOxidation [M7]	[449-461]	1354.68	8.00979e+07	0.74
	RKPGDPLPR		[574-582]	1035.61	47152166	-2.49
	VNSGENAGHTVYDDAGRK		[110-127]	1889.87	4.50547e+07	-1.07
	TPQETQPPAHNYTYHTNAAQR		[16-36]	2425.13	44044622	-0.96
	GMAPIHASK	1xOxidation [M2]	[205-213]	927.472	4.19393e+07	0.2
	VNSGENAGHTVYDDAGR		[110-126]	1761.78	4.10519e+07	-0.59
	YNIGVAMAVASSR		[449-461]	1338.68	3.99773e+07	1.42
	VPPYVVEFVQAEDK		[271-284]	1619.83	38446505	0.7
	QLIEANVPYK		[164-173]	1174.65	3.64548e+07	1.35
	DLPENMCVDFDSIQK	1xCarbamidomethyl [C7]	[405-419]	1810.8	3.52136e+07	2.17
	HQVIMVAGAFFGDEGK		[76-91]	1705.84	2.60705e+07	2.39
	VMLEGPQSYWLSNAR	1xOxidation [M2]	[322-336]	1766.85	2.5813e+07	1.13
	EQLFIGNVSIVTPYHK		[174-189]	1844.99	2.5012e+07	1.26
	NNEVLNINGR		[522-531]	1142.59	2.3487e+07	-1.73
	KPGDPLPR		[575-582]	879.505	2.12639e+07	-0.96
	HHGECGAVTK	1xCarbamidomethyl [C5]	[462-471]	1095.5	1.77276e+07	0.36
	VMLEGPQSYWLSNAR		[322-336]	1750.86	1.36699e+07	1.23
	CDVAHELR	1xCarbamidomethyl [C1]	[306-313]	999.468	1.36276e+07	-1.35
34/PR150	TCSYLVIO_006380	Urocanato hydratase	UROC1	10	12	10	14.67	6.86	675	69.23	4.23364e+06
	Sequence	Modifications	Position in Protein	Theo. MH+ [Da]	Area	DeltaM [ppm]
	IATETLEK		[471-478]	904.499	5.42242e+06	-0.88
	AYPITDYPAK		[92-101]	1138.58	3.71173e+06	-0.08
	LVVGSQAR		[506-513]	829.489	3.56677e+06	-0.84
	ELDESVPHAPK		[25-35]	1221.61	3.35937e+06	-0.82
	ILYADCEGR	1xCarbamidomethyl [C6]	[514-522]	1096.51	1.95832e+06	-0.97
	DHHDVSGTDSPFR		[547-559]	1469.64	1.89356e+06	0.84
	VVLTSGLGGMSGAQGK	1xOxidation [M10]	[248-263]	1477.77	1.86324e+06	0.22
	LRPTQYEMR		[83-91]	1193.61	1.70982e+06	-1.03
	GPVVLSR		[540-546]	727.446	688407	1.67
	VVLTSGLGGMSGAQGK		[248-263]	1461.77	544541	0.09
	ELVQESLR		[378-385]	973.531	249507	-0.74
36/PR150	TCSYLVIO_006380	Urocanate hydratase	UROC1	16	28	16	20.74	6.86	675	69.23	1.58421e+07
	Sequence	Modifications	Position in Protein	Theo. MH+ [Da]	Area	DeltaM [ppm]
	IATETLEK		[471-478]	904.499	2.91819e+07	-1.29
	VVLTSGLGGMSGAQGK		[248-263]	1461.77	9.341e+06	0.92
	ILYADCEGR	1xCarbamidomethyl [C6]	[514-522]	1096.51	9.00342e+06	-0.53
	LRPTQYEMR		[83-91]	1193.61	6.49065e+06	-0.01
	ELDESVPHAPK		[25-35]	1221.61	6.35039e+06	-1.27
	GPVVLSR		[540-546]	727.446	3.99816e+06	1.75
	KYLGVEDLAGK		[237-247]	1192.66	3.73115e+06	-1.96
	DHHDVSGTDSPFR		[547-559]	1469.64	3.59716e+06	-0.31
	AGAEVWTPDDKVR		[415-427]	1443.72	3.53735e+06	-0.05
	TPNLSPADRR		[37-46]	1126.6	2.20478e+06	-3.55
	ELVQESLRR		[378-386]	1129.63	2.20185e+06	-3.28
	LRPTQYEMR	1xOxidation [M8]	[83-91]	1209.6	713523	-2.25
	LKGPVVLSR		[538-546]	968.625	662077	0.41
	VVLTSGLGGMSGAQGK	1xOxidation [M10]	[248-263]	1477.77	422896	0.72
	ELDEYGHIYMYR		[71-82]	1588.71	379447	0.42
	ELVQESLR		[378-385]	973.531	223068	-0.8
	YLGVEDLAGK		[238-247]	1064.56		1.08
	AYPITDYPAK		[92-101]	1138.58		0.77
38/PR150	TCSYLVIO_006380	Urocanate hydratase	UROC1	37	112	37	44.74	6.86	675	68.58	1.10516e+09
	Sequence	Modifications	Position in Protein	Theo. MH+ [Da]	Area	DeltaM [ppm]
	AYPITDYPAK		[92-101]	1138.58	1274892810	1.2
	YLGVEDLAGK		[238-247]	1064.56	1.08632e+09	0.74
	IATETLEK		[471-478]	904.499	9.5426e+08	-2.98
	ILYADCEGR	1xCarbamidomethyl [C6]	[514-522]	1096.51	8.78327e+08	0.03
	ELDESVPHAPK		[25-35]	1221.61	8.54605e+08	-1.88
	VVLTSGLGGMSGAQGK		[248-263]	1461.77	8.50882e+08	-0.16
	ELVQESLR		[378-385]	973.531	7.32208e+08	-1.3
	DHHDVSGTDSPFR		[547-559]	1469.64	6.98756e+08	-1.34
	KYLGVEDLAGK		[237-247]	1192.66	5.42429e+08	-0.26
	LKGPVVLSR		[538-546]	968.625	4.91435e+08	-0.46
	LRPTQYEMR		[83-91]	1193.61	4.40028e+08	-0.62
	YFNTADHEVLAEEFSR		[55-70]	1927.88	4.34111e+08	1.06
	GPVVLSR		[540-546]	727.446	3.67314e+08	-1.18
	AGAEVWTPDDK		[415-425]	1188.55	3.51665e+08	0
	VEGLHVTVPQHVHPDVLK		[656-673]	2004.1	3.2153e+08	0.73
	VVLTSGLGGMSGAQGK	1xOxidation [M10]	[248-263]	1477.77	3.13332e+08	0.64
	AGAEVWTPDDKVR		[415-427]	1443.72	3.03388e+08	-1.19
	MMVEDPAK		[368-375]	920.422	2.5214e+08	-1.84
	NVLTSLVVGIPSPLPPPCK	1xCarbamidomethyl [C18]	[6-24]	1988.12	245920236	0.94
	ELDEYGHIYMYR		[71-82]	1588.71	2.3687e+08	1.81
	QVAAINEMSAR		[387-397]	1189.6	2.19791e+08	-1
	QAIANALR		[47-54]	856.5	2.14241e+08	-1.64
	QISDNLLWIK		[490-499]	1229.69	212708187	1.13
	AWSGNACGHEAMLR	1xCarbamidomethyl [C7]	[638-651]	1559.68	1.88126e+08	-0.64
	ELVQESLRR		[378-386]	1129.63	1.79122e+08	-3.03
	TPNLSPADR		[37-45]	970.495	1.64525e+08	-1.83
	WVCTSCLPEDLELTDR	2xCarbamidomethyl [C3; C6]	[455-470]	1993.9	1.59001e+08	0.65
	TPNLSPADRR		[37-46]	1126.6	1.46602e+08	-3.63
	FKELVQESLR		[376-385]	1248.69	9.58838e+07	2.87
	LRPTQYEMR	1xOxidation [M8]	[83-91]	1209.6	7.30478e+07	-2.63
	AWSGNACGHEAMLR	1xOxidation [M12]; 1xCarbamidomethyl [C7]	[638-651]	1575.68	7.28543e+07	-1.86
	QVAAINEMSAR	1xOxidation [M8]	[387-397]	1205.59	6.35229e+07	-1.63
	MMVEDPAK	1xOxidation [M2]	[368-375]	936.417	5.98926e+07	-1.98
	FWDYGNSFLLEASR		[401-414]	1704.8	5.32137e+07	0.31
	RQVAAINEMSAR		[386-397]	1345.7	4.79735e+07	-2.87
	ELDEYGHIYMYR	1xOxidation [M10]	[71-82]	1604.7	3.85344e+07	-5.08
	RTPNLSPADRR		[36-46]	1282.7	3.66503e+07	-2
	KMMVEDPAK		[367-375]	1048.52	2.36968e+07	-3.53
	AVITNGMMVPNYSTR		[179-193]	1653.81	1.99379e+07	1.87
	RQAIANALR		[46-54]	1012.6	1.70114e+07	-1.48
	RQVAAINEMSAR	1xOxidation [M9]	[386-397]	1361.7	8.61356e+06	-2.38
	VEGLHVTVPQHVHPDVLKK		[656-674]	2132.2	509396	0.4
	RTPNLSPADR		[36-45]	1126.6		-2.04
	LVVGSQAR		[506-513]	829.489		-2.17
80/PR150	TCSYLVIO_000769	Tyrosine aminotransferase	TAT	13	48	7	49.05	6.54	263	42.38	5.71089e+09
	Sequence	Modifications	Position in Protein	Theo. MH+ [Da]	Area	DeltaM [ppm]
	NLLTSAAQIK		[48-57]	1058.62	8.59451e+09	2.4
	LLIVTNPSNPCGSNFSR	1xCarbamidomethyl [C11]	[180-196]	1875.94	6.72262e+09	0.65
	NLVVPGWR		[254-261]	940.536	5560548168	0.57
	LSVGDPTLDK		[38-47]	1044.56	4.92611e+09	1.06
	EAVATWWR		[82-89]	1018.51	3.61205e+09	0.89
	KHVEDIVR		[197-204]	995.563	1.87281e+09	-1.81
	GKDPNATFTSVADFETTVPR		[226-245]	2153.05	1437502530	-0.51
	TVSDNAKPSPSPKPIIK		[21-37]	1779	1.43326e+09	-2.45
	NSFVHKEELK		[90-99]	1230.65	1.18137e+09	-1.85
	HVEDIVR		[198-204]	867.468	937050339	-3.29
	EAIDSQECNGYFPTVGSPEAR	1xCarbamidomethyl [C8]	[61-81]	2327.02	7.76745e+08	0.94
	LSVGDPTLDKNLLTSAAQIK		[38-57]	2084.16	1.79467e+08	2.08
	DPNATFTSVADFETTVPR		[228-245]	1967.93	4.90361e+07	4.21
56/452	TCSYLVIO_004599	Histidine ammonia-lyase	HAL	16	37	16	29.59	8.34	534	51.11	3.93475e+08
	Sequence	Modifications	Position in Protein	Theo. MH+ [Da]	Area	DeltaM [ppm]
	LPAFLVK		[374-380]	787.508	5.627e+08	-0.41
	FLGVLTVK		[518-525]	876.555	3.8835e+08	-0.59
	VINTDIDNVTK		[487-497]	1231.65	2.29376e+08	-0.58
	LNNPTLSR		[366-373]	914.505	2.11387e+08	-0.99
	GATIEISDEAVAR		[23-35]	1331.68	1.54632e+08	0.52
	VQDAYSIR		[282-289]	951.489	1.41302e+08	-0.7
	GQQLVAQR		[251-258]	899.506	1.34021e+08	-1.37
	TVKPYVPEEAR		[507-517]	1288.69	1.31472e+08	-1.42
	SHSACVGEPLTPER	1xCarbamidomethyl [C5]	[83-96]	1539.72	1.29774e+08	0.45
	VVSGGNFHGEYPAK		[330-343]	1461.71	1.28351e+08	-0.51
	LADVALAMSHEALR		[220-233]	1496.79	1.2076e+08	1.45
	ATNSTLNPDIHR		[234-245]	1338.68	1.19954e+08	-1.34
	SVSPPWEEDR		[477-486]	1201.55	9.12374e+07	-0.41
	DAGSVLR		[173-179]	717.389	58252970	-1.98
	QTVYGINTGFGK		[51-62]	1284.66	5.67861e+07	2.93
	LADVALAMSHEALR	1xOxidation [M8]	[220-233]	1512.78	4.98215e+07	0.15
	KVVSGGNFHGEYPAK		[329-343]	1589.81	2.80455e+07	0.29
93/452	TCSYLVIO_001538	Aspartate aminotransferase	GOT1	13	67	13	42.34	8.81	418	36.50	6136901332
	Sequence	Modifications	Position in Protein	Theo. MH+ [Da]	Area	DeltaM [ppm]
	AAISGLNSTNVSYVAK		[396-411]	1594.84	6.37037e+09	1.86
	VLSQYALLIR		[292-301]	1175.71	6.24313e+09	1.95
	AAGITLPPYTYYSPATK		[159-175]	1813.94	5.7972e+09	0.86
	GIDLPGMLK		[176-184]	943.528	4.60537e+09	0.27
	TMYSNPPITGAR		[302-313]	1307.64	3.7461e+09	0.31
	DDANRPFVLESVK		[62-74]	1489.76	3.47795e+09	1.31
	VASCHTLGGTGALR	1xCarbamidomethyl [C4]	[114-127]	1399.71	2667244069	-0.05
	ELGECGSVLDWSHIER	1xCarbamidomethyl [C5]	[349-364]	1886.87	2.38735e+09	0.4
	TMYSNPPITGAR	1xOxidation [M2]	[302-313]	1323.64	1.68814e+09	0.27
	YLVENVPNVIVAQSFSK		[251-267]	1907.03	1.28649e+09	1.91
	VNLAVGVYR		[53-61]	990.573	9.53103e+08	0.94
	QIGMMSYTGLTK		[365-376]	1329.65	3.67248e+08	2.92
	QIGMMSYTGLTK	1xOxidation [M5]	[365-376]	1345.65	2.8729e+08	0.05
	CGALHMVVENPEEVGR	1xCarbamidomethyl [C1]	[276-291]	1796.84	2.24049e+08	2.32
	CGALHMVVENPEEVGR	1xOxidation [M6]; 1xCarbamidomethyl [C1]	[276-291]	1812.84	5.54425e+07	-0.79
	QIGMMSYTGLTK	2xOxidation [M4; M5]	[365-376]	1361.64	5.28977e+07	1.45
	SDTGSDMEYAPINGMR		[76-91]	1743.73		1.95
	SDTGSDMEYAPINGMR	1xOxidation [M7]	[76-91]	1759.73		1.57
111/452	TCSYLVIO_006042	Arginase	AQRG	12	28	12	54.22	6.46	308	25.88	6.28983e+08
	Sequence	Modifications	Position in Protein	Theo. MH+ [Da]	Area	DeltaM [ppm]
	LLSLFSAQR		[10-18]	1034.6	8.6977e+08	0.81
	VFTVLAR		[97-103]	805.493	6.13143e+08	0.12
	LYDAGDITASTLEEAHEK		[75-92]	1962.93	4.04036e+08	2.5
	VHSGTPFR		[152-159]	900.469	3.76329e+08	-0.35
	KGPAAFR		[46-52]	746.431	3.02608e+08	-1.98
	NTFFSFDVDSLK		[222-233]	1419.68	1.43644e+08	2.87
	QLLEESSFSGK		[160-170]	1224.61	1.10428e+08	1.88
	LGSVNNLELNVDASHLK		[58-74]	1822.97	8.35061e+07	2.13
	GAFPFVIGGGNDQSAPNGR		[104-122]	1860.9	7.49728e+07	1.83
	GAVAALEDAFGLTGK		[207-221]	1419.75	3.1642e+07	1.22
	EEDADIVIIGFPYDEGCVR	1xCarbamidomethyl [C17]	[19-37]	2197.01	21854383	1.22
	AFPGDVGVINVDSHLDVRPPLSDGR		[127-151]	2632.35	2.04583e+06	0.28
112/452	TCSYLVIO_003182	Pyridoxal kinase	PDXK	5	19	1	23	6.44	300	20.23	5.57466e+08
	Sequence	Modifications	Position in Protein	Theo. MH+ [Da]	Area	DeltaM [ppm]
	FTGVVPYHEGR		[214-224]	1261.63	9.66781e+08	0.08
	SVQSLLNPATVAEVKPM	1xOxidation [M17]	[284-300]	1799.96	5.57466e+08	2.6
	NEGGDGTSSLMNR	1xOxidation [M11]	[265-277]	1353.57	4.61409e+08	-0.59
	NEGGDGTSSLMNR		[265-277]	1337.58	3.93684e+08	0.53
	YIITGYINNADIVR		[80-93]	1624.87	2.3543e+08	1.56
	MDLQEYETLMEGMR	3xOxidation [M1; M10; M13]	[57-70]	1793.74	143072443	1.57
113/452	TcCLB.506213.50	Prostaglandin F synthase	PGFS	4	6	4	15.66	8.82	281	24.00	1.98684e+08
	Sequence	Modifications	Position in Protein	Theo. MH+ [Da]	Area	DeltaM [ppm]
	SPAQVVIR		[214-221]	869.52	4.07459e+08	-0.09
	NHVLGEIAK		[201-209]	980.552	1.54131e+08	0.31
	IRPMVNQVELHPLFQQR	1xOxidation [M4]	[155-171]	2121.14	3.44623e+07	0.77
	QIDELNEDKR		[258-267]	1259.62	2.75865e+07	-0.6
115/452	TcCLB.511693.90	Electron-transfer-flavoprotein, alpha polypeptide	ETFA	16	57	4	57.01	8.27	321	24.00	8.95775e+08
	Sequence	Modifications	Position in Protein	Theo. MH+ [Da]	Area	DeltaM [ppm]
	VGPVTALVAGK		[38-48]	1011.62	1.45063e+09	3.47
	ILNELAEPLK		[222-231]	1139.67	1.09228e+09	2.35
	GVENVLAAK		[62-70]	900.515	6.21304e+08	-2.27
	VSPATLAAVTAGMK		[24-37]	1316.72	6.15386e+08	0.96
	VSPATLAAVTAGMK	1xOxidation [M13]	[24-37]	1332.72	5.39624e+08	2.38
	APLDGGSAQTK		[165-175]	1044.53	5.13889e+08	-0.92
	DGYTHVFAGTSAFGK		[92-106]	1557.73	4.8859e+08	1.08
	LMYAGNVVSTVR		[136-147]	1309.69	4.7512e+08	1.21
	LMYAGNVVSTVR	1xOxidation [M2]	[136-147]	1325.69	3.2854e+08	2
	LTSLVK		[315-320];	660.429	2.86108e+08	-0.54
	AVVDAGYCPNEMQIGQTGK	1xOxidation [M12]; 1xCarbamidomethyl [C8]	[239-257]	2053.93	2.57944e+08	1.75
	ADAMPISDVTEVKDDSTFVR	1xOxidation [M4]	[116-135]	2212.04	2.51948e+08	1.35
	GLPEEYAPLIASVVK		[77-91]	1585.88	2.38642e+08	0.54
	ADAMPISDVTEVK	1xOxidation [M4]	[116-128]	1391.67	1.88893e+08	1.06
	DDSTFVR		[129-135]	839.389	1.36305e+08	0.24
	ADAMPISDVTEVK		[116-128]	1375.68	1.06939e+08	1.11
	ADAMPISDVTEVKDDSTFVR		[116-135]	2196.05	1.01684e+08	1.91
	VLVVAEMHNGK		[13-23]	1196.65	6.45643e+07	0.37
	VLVVAEMHNGK	1xOxidation [M7]	[13-23]	1212.64	5.79752e+07	-0.78
	AAVGATR		[232-238]	645.368	34721974	-0.2
	TVAPNFYLGCGVSGAIQHVAGMK	1xOxidation [M22]; 1xCarbamidomethyl [C10]	[258-280]	2393.17	6.20588e+06	1.35
116/452	TcCLB.506213.50	Prostaglandin F synthase	PGFS	8	24	8	30.25	8.82	281	24.00	1.32053e+09
	Sequence	Modifications	Position in Protein	Theo. MH+ [Da]	Area	DeltaM [ppm]
	SPAQVVIR		[214-221]	869.52	1.87065e+09	-0.09
	IQENFNVWDFK		[240-250]	1439.7	1050984084	2.01
	EEVWVTTK		[70-77]	991.509	1039970010	0.7
	NHVLGEIAK		[201-209]	980.552	964583928	0.43
	IRPMVNQVELHPLFQQR	1xOxidation [M4]	[155-171]	2121.14	7.01154e+08	0.6
	WDIQHGIVTIPK		[222-233]	1406.78	547834091	0.2
	VWNSDQGYEK		[78-87]	1225.55	5.36797e+08	0.49
	IRPMVNQVELHPLFQQR		[155-171]	2105.14	1.86042e+08	1.4
	QIDELNEDKR		[258-267]	1259.62	1.2545e+08	-0.98
118/452	TcCLB.510105.240	Short chain 3-hydroxyacyl-coa dehydrogenase	HCD2	9	30	9	34.69	8.63	320	23.50	1.45155e+09
	Sequence	Modifications	Position in Protein	Theo. MH+ [Da]	Area	DeltaM [ppm]
	GDATVEDVDLAMK		[242-254]	1363.64	2.01039e+09	1.48
	EEPENPLFKPSK		[285-296]	1414.72	1345636150	-0.92
	GDATVEDVDLAMK	1xOxidation [M12]	[242-254]	1379.64	1.20439e+09	0.73
	KSIESSLSR		[73-81]	1006.55	9.98624e+08	-0.21
	FAGLHFFSPVPMMK	2xOxidation [M12; M13]	[171-184]	1640.8	6.68889e+08	0
	FAGLHFFSPVPMMK	1xOxidation [M]	[171-184]	1624.8	2.1204e+08	1.07
	LIADAWHK		[277-284]	953.52	1.91684e+08	-0.77
	ECVFCTNTSSLSVGEQAAVTGRPDR	2xCarbamidomethyl [C2; C5]	[146-170]	2741.26	1.31228e+08	1.98
	LIADAWHKEEPENPLFKPSK		[277-296]	2349.22	1.21996e+08	2.19
	LGCGHPMGPFVLADSIGIDVLK	1xOxidation [M7]; 1xCarbamidomethyl [C3]	[255-276]	2312.18	2.02459e+07	1.15
	KTGEGFYK		[310-317]	929.473	1.21638e+07	-1.27
Cytoskeleton
28/PR150	TCSYLVIO_002534	Calpain-like cysteine peptidase, putitative	SMP-1	10	18	10	15.03	5.05	692	73.76	2.44881e+06
	Sequence	Modifications	Position in Protein	Theo. MH+ [Da]	Area	DeltaM [ppm]
	LPYVFGLR		[621-628]	964.561	3.81079e+06	-0.71
	ALSPGCGIFDNAR	1xCarbamidomethyl [C6]	[646-658]	1377.66	2.29309e+06	-0.14
	LLFFPEYNLR		[429-438]	1311.71	1.24253e+06	-1.07
	AEGISDEYLK		[136-145]	1124.55	737726	0.26
	LGHVYSALK		[420-428]	987.562	704601	-1.48
	HPVSIEEGK		[268-276]	995.516	401209	-0.33
	NTIDKETYELYK		[153-164]	1516.75	336161	-0.96
	DLAVQDK		[146-152]	788.415	246974	-1.8
	SPVEVGTPNSQVR		[629-641]	1369.71		-0.67
	LVGESSSSDEMVK	1xOxidation [M11]	[165-177]	1383.63		-0.81
102/PR150	TcCLB.506563.40	Beta tubulin	TUBB	11	23	11	22.85	4.81	442	29.92	2.87716e+08
	Sequence	Modifications	Position in Protein	Theo. MH+ [Da]	Area	DeltaM [ppm]
	LAVNLVPFPR		[253-262]	1125.68	3.45046e+08	2.18
	LREEYPDR		[155-162]	1077.53	3.01331e+08	-1.43
	FPGQLNSDLR		[242-251]	1146.59	2.16771e+08	1.65
	INVYFDEATGGR		[47-58]	1341.64	2.05345e+08	0.91
	AVLIDLEPGTMDSVR	1xOxidation [M11]	[63-77]	1631.83	9.55877e+07	0.57
	FPGQLNSDLRK		[242-252]	1274.69	8.50813e+07	-1.47
	AVLIDLEPGTMDSVR		[63-77]	1615.84	7.7804e+07	1.29
	EIVCVQAGQCGNQIGSK	2xCarbamidomethyl [C4; C10]	[3-19]	1847.87	6.73582e+07	-2.06
	KLAVNLVPFPR		[252-262]	1253.77	3.1314e+07	2.26
	IMMTFSIIPSPK		[163-174]	1364.73	2.81818e+07	1.05
	LHFFMMGFAPLTSR	2xOxidation [M5; M6]	[263-276]	1686.81	21413553	0.47
	MREIVCVQAGQCGNQIGSK	2xCarbamidomethyl [C6; C12]; 1xOxidation [M1]	[1-19]	2151.01	1.56159e+07	-1.34
	LHFFMMGFAPLTSR	1xOxidation [M5]	[263-276]	1670.82	1.23551e+07	0.98
142/PR150	TCSYLVIO_008641	Epsilon tubulin	TUBE1	9	57	9	21.56	6.52	385	21.68	4.25378e+09
	Sequence	Modifications	Position in Protein	Theo. MH+ [Da]	Area	DeltaM [ppm]
	EIVDLCLDR	1xCarbamidomethyl [C6]	[146-154]	1132.57	5.91904e+09	1.74
	LSVDYGK		[190-196]	781.409	3.71922e+09	-0.31
	GHYTIGK		[139-145]	775.41	3.12308e+09	-2.75
	EDAANNYAR		[130-138]	1023.45	1.79984e+09	-0.83
	QLFHPEQLISGK		[118-129]	1396.76	1.71134e+09	0.37
	LSVDYGKK		[190-197]	909.504	7.88382e+08	-2.48
	AVFLDLEPTVVDEIR		[98-112]	1715.92	2.15412e+08	0.29
	DVNAAVATIK		[360-369]	1001.56	2.97565e+07	0.39
	TIQFVDWSPTGFK		[373-385]	1525.77	2.08036e+07	0.67
102/452	TcCLB.506563.40	Beta tubulin	TUBB	15	74	9	33.26	4.81	442	29.92	4.87775e+09
	Sequence	Modifications	Position in Protein	Theo. MH+ [Da]	Area	DeltaM [ppm]
	LAVNLVPFPR		[253-262]	1125.68	10194229099	1.42
	INVYFDEATGGR		[47-58]	1341.64	4327711151	1.09
	AVLIDLEPGTMDSVR	1xOxidation [M11]	[63-77]	1631.83	3.60594e+09	-0.55
	AVLIDLEPGTMDSVR		[63-77]	1615.84	3.21638e+09	0.53
	FPGQLNSDLR		[242-251]	1146.59	3.00974e+09	2.08
	LREEYPDR		[155-162]	1077.53	1.70005e+09	-0.86
	GLSVPELTQQMFDAK	1xOxidation [M11]	[283-297]	1679.83	1.42927e+09	-0.75
	EIVCVQAGQCGNQIGSK	2xCarbamidomethyl [C4; C10]	[3-19]	1847.87	1.39344e+09	0.12
	LHFFMMGFAPLTSR	2xOxidation [M5; M6]	[263-276]	1686.81	8.05802e+08	0.15
	KLAVNLVPFPR		[252-262]	1253.77	7.35334e+08	1.19
	GLSVPELTQQMFDAK		[283-297]	1663.84	7.09526e+08	0.66
	FPGQLNSDLRK		[242-252]	1274.69	6.71187e+08	-0.82
	IMMTFSIIPSPK	2xOxidation [M2; M3]	[163-174]	1396.72	5.18841e+08	1.14
	IMMTFSIIPSPK	1xOxidation [M]	[163-174]	1380.73	3.82827e+08	1.81
	LHFFMMGFAPLTSR	1xOxidation [M]	[263-276]	1670.82	3.11166e+08	2.73
	IMMTFSIIPSPK		[163-174]	1364.73	3.07768e+08	1.14
	MREIVCVQAGQCGNQIGSK	1xOxidation [M1]; 2xCarbamidomethyl [C6; C12]	[1-19]	2151.01	2.02442e+08	-0.06
	LHFFMMGFAPLTSR		[263-276]	1654.82	150191323	1.49
	VGEQFTAMFR		[381-390]	1185.57	1.0475e+08	-1.88
	YLTASALFR		[310-318]	1041.57	9.09192e+07	1.8
	EVDEQMLNVQNK	1xOxidation [M6]	[325-336]	1462.68	4.22189e+07	0.43
	MREIVCVQAGQCGNQIGSK	2xCarbamidomethyl [C6; C12]	[1-19]	2135.02	3.85027e+07	-1.21
142/452	TCSYLVIO_008641	Epsilon tubulin	TUBE1	6	15	6	15.58	6.52	385	7.05	1.36543e+09
	Sequence	Modifications	Position in Protein	Theo. MH+ [Da]	Area	DeltaM [ppm]
	EIVDLCLDR	1xCarbamidomethyl [C6]	[146-154]	1132.57	1.64127e+09	0.44
	GHYTIGK		[139-145]	775.41	1.59585e+09	-2.99
	EDAANNYAR		[130-138]	1023.45	8.59176e+08	-2.26
	QLFHPEQLISGK		[118-129]	1396.76	4.30091e+08	-0.68
	LSVDYGKK		[190-197]	909.504	3.09665e+08	-3.15
	AVFLDLEPTVVDEIR		[98-112]	1715.92	1.18567e+07	0.08
